1 ***In vivo* high-throughput screening of novel adeno-associated viral**  
2 **capsids targeting adult neural stem cells in the subventricular zone**

3 **Sascha Dehler<sup>1†</sup>, Lukas PM Kremer<sup>1,5†</sup>, Santiago Cerrizuela<sup>1\*</sup>, Thomas Stiehl<sup>4\*</sup>, Jonas**  
4 **Weinmann<sup>2</sup>, Heike Abendroth<sup>1</sup>, Susanne Kleber<sup>1</sup>, Alexander Laure<sup>1</sup>, Jihad El Andari<sup>2</sup>,**  
5 **Simon Anders<sup>5</sup>, Anna Marciniak-Czochra<sup>4</sup>, Dirk Grimm<sup>2,3</sup>, Ana Martin-Villalba<sup>1\*</sup>**

6 <sup>1</sup>Molecular Neurobiology, German Cancer Research Center (DKFZ), 69120 Heidelberg, Germany

7 <sup>2</sup>Virus-Host Interaction Group, Department of Infectious Diseases/Virology, Heidelberg  
8 University Hospital, Cluster of Excellence Cell Networks, BioQuant, 69120 Heidelberg, Germany

9 <sup>3</sup>German Center for Infection Research (DZIF) and German Center for Cardiovascular Research  
10 (DZHK), partner site Heidelberg, 69120 Heidelberg, Germany

11 <sup>4</sup>Institute of Applied Mathematics, Interdisciplinary Center for Scientific Computing and  
12 BioQuant, Heidelberg University, 69120 Heidelberg, Germany

13 <sup>5</sup>Center for Molecular Biology of Heidelberg University (ZMBH), 69120 Heidelberg, Germany

14 <sup>†</sup>Contributed equally.

15 <sup>\*</sup>Contributed equally.

16 <sup>\*</sup>Correspondence:

17 Prof. Dr. Ana Martin-Villalba;

18 [a.martin-villalba@dkfz.de](mailto:a.martin-villalba@dkfz.de)

19 **Keywords: neural stem cells, ventricular-subventricular zone, v-SVZ, Adeno-Associated**  
20 **Virus, AAV, gene therapy, single cell RNA-seq**

21 **Abstract**

22 The adult mammalian brain entails a reservoir of neural stem cells (NSCs) generating glial cells  
23 and neurons. However, NSCs become increasingly quiescent with age, which hampers their  
24 regenerative capacity. New means are therefore required to genetically modify adult NSCs for re-  
25 enabling endogenous brain repair. Recombinant adeno-associated viruses (AAVs) are ideal gene  
26 therapy vectors due to an excellent safety profile and high transduction efficiency. We thus  
27 conducted a high-throughput screening of 177 intraventricularly injected barcoded AAV variants  
28 profiled by RNA sequencing. Quantification of barcoded AAV mRNAs identified two synthetic  
29 capsids, AAV9\_A2 and AAV1\_P5, both of which transduce active and quiescent NSCs. Further  
30 optimization of AAV1\_P5 by judicious selection of promoter and dose of injected viral genomes  
31 enabled labeling of 30-60% of the NSC compartment, which was validated by FACS analyses and  
32 single cell RNA sequencing. Importantly, transduced NSC readily produced neurons. The present  
33 study identifies AAV variants with a high regional tropism towards the v-SVZ with high efficiency  
34 in targeting adult NSCs, thereby paving the way for preclinical testing of regenerative gene  
35 therapy.

36

37

## 38 **Introduction**

39 The adult brain has long been considered as a tissue with no regenerative capacity partly due to  
40 the absence of pluripotent cells. In the late 1990's, a reservoir of neural stem cells (NSCs) with the  
41 potential to generate glia and neuronal progeny was identified in the adult mammalian brain<sup>1,3</sup>.  
42 The largest reservoir of NSCs in rodents is located along the walls of the lateral ventricles, the so-  
43 called ventricular-subventricular zone (v-SVZ). The potential of these NSCs to produce different  
44 glia and neuronal subtypes has been demonstrated by lineage-tracing studies<sup>4-6</sup>. NSCs get activated  
45 to provide progeny for tissue homeostasis but also in the frame of a traumatic brain injury<sup>7-12</sup>.  
46 However, the ability to activate NSCs highly declines with age<sup>2</sup>, hampering repair of the brain.  
47 This fairly limited endogenous regenerative capacity calls for new strategies to specifically target  
48 and genetically modify adult NSCs within the natural environment of the brain.

49 Many different viral and transgenic approaches have been developed in the past to manipulate  
50 adult NSCs and their progeny<sup>13</sup>. For a long time, onco-retroviruses and lentiviruses that integrate  
51 their genomes into the host cellular chromatin were the tools of choice. However, limitations of  
52 integrating viruses<sup>14</sup>, such as insertional mutagenesis<sup>15,16</sup>, gradual silencing of the inserted  
53 transgene<sup>17,18</sup> and the fact that not all non-dividing cells are equally transduced *in vivo*<sup>19</sup> hamper  
54 their use for targeting of especially quiescent (q)NSCs within the v-SVZ. Over the last few years,  
55 the non-enveloped adeno-associated viral (AAV) vectors have taken center stage as a gene delivery  
56 vehicle for human gene therapy with two gene therapeutic approaches that have gained regulatory  
57 approval for commercial use in patients: Glybera (uniQure) and Luxturna (Novartis) and with a  
58 large amount of AAV gene therapeutic strategies even in the CNS under clinical development, as  
59 reviewed in<sup>20,21</sup>.

60 AAVs are small virus particles, belonging to the dependoviruses within the parvoviridae family  
61 with a capsid diameter of ~22nm that is sterically limiting its genome to ~4.7kb<sup>22</sup>. The original  
62 AAV genome consists of only two genes, the *rep* and *cap* gene, which are organized in three open  
63 reading frames. The *cap* gene determines the structure of the AAV capsid, while the *rep* gene is  
64 involved in several processes ranging from transcription initiation to packaging of the AAV  
65 genome. For vector production these genes are commonly delivered in trans and thus can be easily  
66 modified<sup>23–30</sup>. Over the last decades, hundreds of AAV isolates were identified in various species,  
67 with an interestingly high homology regarding their capsid protein amino acid sequences, e.g. up  
68 to 99% for the primate isolate AAV1 compared to the human isolate AAV6<sup>31</sup>. Favorable safety  
69 profiles combined with the ability to mediate long-term transgene expression and to efficiently  
70 target many different human tissues are major assets that make AAVs a preferred technology<sup>23,32–</sup>  
71 <sup>35</sup>.

72 Nonetheless, specific targeting of NSCs in the v-SVZ has remained challenging to date. While the  
73 most efficient wild-type (wt) serotype, AAV9, shows high transduction efficiency upon  
74 intravenous and intracranial injection, it mainly targets neurons and astrocytes, but not NSCs<sup>36–38</sup>.  
75 Just recently, the power of structure-guided DNA shuffling was used to develop the newly  
76 engineered AAV variant SCH9. This new variant was able to target cells in the v-SVZ including  
77 NSCs<sup>39</sup>. However, to date, the usefulness of AAV vectors for transduction of stem cells remains  
78 debated, mainly based on conflicting reports concerning their transduction efficiency as  
79 reviewed<sup>40</sup>. The variable regions of the VP protein, which is encoded by the *cap* gene, are involved  
80 in receptor binding and antibody recognition and thus modifications thereof can be used to guide  
81 targeting of specific cell types. Engineering of the AAV capsid for optimization of organ, region  
82 or cell specificity can be achieved by methods such as random *cap* gene mutation, DNA family

83 shuffling or peptide display, combined with *in vivo* selection<sup>39,41–47</sup>. Most recently, barcoding of  
84 double-stranded encapsidated DNA and next-generation sequencing (NGS) were shown to allow  
85 for high-throughput screening of AAV capsid libraries<sup>48,49</sup>. Here we apply these barcoded AAV-  
86 libraries by intracerebroventricular injection of the adult rodent brain. Using a combination of  
87 NGS, immunohistochemistry, flow cytometry and mathematical modeling we validate  
88 transduction of the NSCs within the v-SVZ and their neurogenic lineage by the novel AAV capsid  
89 AAV1\_P5.

## 90 **Results**

91 To identify AAV capsids able to transduce NSCs in the v-SVZ with the highest transduction  
92 efficiency possible, we performed an NGS-based high-throughput screening of 177 different  
93 barcoded AAV capsid variants. These AAV variants comprise 12 AAV wts, 94 newly generated  
94 peptide display mutants based on these wts and 71 chimeric capsids generated through DNA  
95 family shuffling. Among the synthetic capsids are 24 previously published benchmarks, the  
96 remaining ones were generated as described in the Methods section, Table S4 and in greater detail  
97 in <sup>50</sup>. All AAV capsid variants were uniquely barcoded (with a 15 nt long random DNA sequence)  
98 and packaged into an AAV vector expressing a CMV promoter-controlled eYFP (enhanced yellow  
99 fluorescent protein) that harbors the barcode in its 3'UTR. A library comprising either 91 (library  
100 #1 from <sup>50</sup>) or 157 (library #3 from <sup>50</sup>) capsid variants was directly injected into the lateral  
101 ventricles of the adult mouse brain ( $10^{10}$  viral genomes in 2 $\mu$ l per mouse (vg), Fig 1a, Fig S2a).  
102 7 days post-injection (dpi), quiescent and active NSCs (qNSCs or aNSCs, respectively), as well as  
103 other cell populations of the v-SVZ including transient amplifying progenitors (TAPs),  
104 neuroblasts, astrocytes, oligodendrocytes and ependymal cells, were FACS-sorted as previously

105 described<sup>2,7,51</sup> (Fig S1a-b, Tables S2 and S3). Finally, RNA libraries from the different cell  
106 populations were generated for NGS analysis (Fig 1a). In parallel, additional mice were sacrificed  
107 at 7 dpi for detection of the eYFP reporter in the v-SVZ. Efficient transduction of cells in the v-  
108 SVZ by both AAV libraries was confirmed by detecting the expression of the eYFP reporter along  
109 the ventricular walls (Fig 1b). Already after 7 dpi, few eYFP-positive (eYFP<sup>+</sup>) cells migrated to  
110 the olfactory bulb (OB) and were detected in the core and granular cell layer (GCL; Fig 1c),  
111 indicating that the AAV vector was retained along the lineage and did not prevent migration. For  
112 AAV mRNA analysis, capsids were ranked within each sorted cell population by the relative  
113 expression of their cognate barcodes, normalized by their frequency within library #1 and library  
114 #3. Overall capsid rankings of the 71 capsids shared by both libraries revealed the same top  
115 candidates and correlated strongly (Spearman's rank correlation  $\rho = 0.84$ ,  $p < 0.01$ ) (Fig 1d).  
116 Furthermore, we did not find a significant association between barcode GC-content and frequency  
117 in either library (Fig S2l-m and Methods section), indicating that the results are not strongly  
118 influenced by GC-bias. Further analysis revealed that two synthetic capsids, AAV1\_P5 and  
119 AAV9\_A2 (peptide-modified derivatives of wt AAV1 or AAV9, respectively), stood out as the  
120 most efficient AAV capsid variants based on the ranking of their barcode enrichment (Fig 1d-j,  
121 Fig S2b-k). Notably, both active and quiescent NSCs were robustly transduced by these two AAV  
122 capsids (Fig 1f,g,i,j). Besides, AAV1\_P5 and AAV9\_A2 transduced other v-SVZ cell types, such  
123 as TAPs (Fig S2b,g), neuroblasts (Fig S2c,h), astrocytes (Fig S2d,i), oligodendrocytes (Fig S2e,j)  
124 and ependymal cells (Fig S2f,k). These two lead candidates clearly outperformed the well-  
125 established AAV2 and AAV9 wt capsids across all v-SVZ-cell populations (Fig 1k,l), as well as  
126 the parent wt AAV1. Taken together, our study has successfully identified AAV capsids that were  
127 highly region-specific for the v-SVZ, probably due to inability to migrate out of this region as

128 reported for the SCH9 variant. These candidates exhibited a higher efficiency in targeting both  
129 active and quiescent NSCs than established wt AAV variants in the v-SVZ *in vivo*.

130 One potential application of gene therapy is to genetically modify freshly isolated cells and  
131 transplant them back to the donor. Hence, to identify the capsid with the fastest transduction rate  
132 of isolated NSCs, we assessed the expression dynamics of AAV2\_wt, AAV9\_wt, AAV9\_A2 and  
133 AAV1\_P5 in NSCs *in vitro*. To detect viral transduction of targeted cells and their progeny, we  
134 took advantage of the Cre/loxP system and engineered the AAVs to express a CAG promoter-  
135 controlled Cre recombinase fused to GFP (CAG\_Cre::GFP). We decided to use the CAG promoter  
136 to assess performance of these capsids, since this promoter proved to outperform other promoters  
137 for *in utero* electroporation of embryonic neural progenitors<sup>52</sup>. Subsequently, we transduced  
138 primary cultured NSCs from tdTomato-flox mice (Fig 2a). Cre-fused GFP and cytoplasmic  
139 tdTomato were detected via immunocytochemistry at day 1, 3, 5 and 7 post-transduction (dpt) (Fig  
140 2a-b). Interestingly, while all capsids showed a similar number of transduced cells at 7 dpt (Fig  
141 2c-d), AAV1\_P5 exhibited the fastest transduction kinetics (Fig 2c), already showing labeling at  
142 day 1 (Fig S3a,b).

143 Next, we investigated whether the newly identified AAV capsids AAV1\_P5 and AAV9\_A2 also  
144 target v-SVZ cells *in vivo*. To this end, we individually injected  $10^9$  vg of AAV9\_A2, AAV1\_P1  
145 or the well-established wt serotypes AAV9 and AAV2, all containing the CAG\_Cre::GFP  
146 construct, into tdTomato-flox mice (Fig 2e). Notably, at 7 dpi, the tropism towards the v-SVZ  
147 highly differed between the tested capsids (Fig 2f-g). AAV2\_wt and in particular AAV9\_wt  
148 targeted many cells outside the v-SVZ, especially in the medial and dorsal wall of the lateral  
149 ventricles, whereas the striatum was not targeted (Fig 2f,g and data not shown). In contrast to the  
150 wt capsids, AAV1\_P5 and AAV9\_A2 demonstrated a significantly higher tropism towards the v-

151 SVZ (Fig 2i). AAV1\_P5 showed the most unique tropism with 98% of all tdTomato-labeled cells  
152 lying along the v-SVZ. In addition, transduction rates of overall cells also differed between the  
153 four capsids. AAV1\_P5 and AAV9\_A2 exhibited the fastest kinetics and most robust rate of  
154 transduction, with AAV1\_P5 transducing the largest number of cells at 5 dpi as compared to the  
155 other capsids (Fig 2j). The overall number of transduced NSCs became similar at 7 dpi for all  
156 capsids except AAV2\_wt (Fig 2j). Nevertheless, AAV9\_wt mostly targeted cells lying outside the  
157 ventricular wall that we clearly identified as neurons based on their morphology. By contrast,  
158 AAV1\_P5 and AAV9\_A2 exhibited a selective tropism for the v-SVZ mainly targeting  
159 NSCs/TAPs (Sox2<sup>+</sup>/GFAP<sup>+</sup>/S100b<sup>-</sup>) as well as ependymal cells (Sox<sup>+</sup>/S100b<sup>+</sup>; Fig 2h,j).

160 Along the wall of the v-SVZ, ependymal cells are organized in a so-called pinwheel architecture  
161 with NSCs in the center<sup>53</sup>. Within these structures, ependymal cells outnumber NSCs, explaining  
162 why AAV1\_P5 and AAV9\_A2 transduce more ependymal cells overall. A recent report using  
163 single cell transcriptomics and fate-mapping of ependymal cells demonstrates their inability to  
164 generate progeny even after growth factor administration or brain injury<sup>54</sup>. This ensures that  
165 progeny labeled with AAV1\_P5 or AAV9\_A2 stems from NSCs. However, manipulated  
166 ependymal cells communicate with neighboring NSCs and might indirectly change the progeny of  
167 these NSCs. To address this, strategies to de-target ependymal cells, such as using a miRNA-  
168 regulated viral vector<sup>55,56</sup> or an NSC-specific promoter, might be of use. Taken together, our data  
169 demonstrate a unique tropism and fast targeting of NSCs/TAPs and ependymal cells within the v-  
170 SVZ by AAV1\_P5 and AAV9\_A2.

171 To select the best candidate between AAV1\_P5 and AAV9\_A2 regarding NSC transduction  
172 efficiency, we performed FACS analysis of the v-SVZ and OB of injected mice. 2 months old  
173 C57BL/6N mice were injected with 10<sup>10</sup> vg in 10 µl of either AAV1\_P5 or AAV9\_A2 capsids



174 containing the eYFP reporter under the CMV promoter, as these were the capsids used for the  
175 barcoded libraries. 6 days after injection, mice were sacrificed and NSCs with their progeny from  
176 the v-SVZ and the OB neuroblasts were analyzed by FACS quantification (Fig S3c and S6a,b). By  
177 determining the fraction of YFP<sup>+</sup> cells among these cell types, we calculated the labeling efficiency  
178 of the different viruses. Our results show that AAV1\_P5 has a higher labeling efficiency for NSC  
179 (11.19%) than the AAV9\_A2 capsid (2.95%) (Fig S3d). This higher transduction efficiency could  
180 also be seen for qNSC, aNSC, TAPs and NBs from the SVZ (Fig S3d). This prompted us to  
181 proceed with the AAV1\_P5 capsid for further experiments. Of note, the overall low number of  
182 detected YFP-positive cells is due to the lower sensitivity of FACS analysis for YFP-expressing  
183 cells as compared to mCherry or tdTomato, as previously shown (Tlx-YFP vs. tdTomato-YFP  
184 in<sup>57</sup>).

185 In order to test the ability of directly AAV1\_P5 transduced NSCs to generate progeny, freshly  
186 isolated NSCs from tdTomato-flox mice were transduced with AAV1\_P5 expressing Cre  
187 recombinase under the control of a CMV promoter (CMV\_Cre). Thereafter, transduced cells were  
188 transplanted into the v-SVZ of C57BL/6N wt mice (Fig S4a). After 35 days, tdTomato-positive  
189 neurons were present in the GCL of the OB (Fig S4b-d). In summary, transduction of NSCs by  
190 AAV1\_P5 *ex vivo* does not interfere with their capability to self-renew and differentiate into OB  
191 interneurons.

192 In order to fully characterize the identity of AAV1\_P5 transduced cells, as well as potential  
193 changes arising by the AAV-transduction itself, we profiled these cells and untransduced ones  
194 from the same mouse by single cell RNA sequencing (scRNA-seq). To this end, three months-old  
195 eYFP-reporter mice (TiCY, Tlx-CreERT2-YFP mice<sup>58</sup>) were injected with 10<sup>9</sup> vg/mouse  
196 AAV1\_P5 harboring the CMV\_Cre construct. Upon transduction, Cre recombinase causes the

197 excision of a transcription terminator upstream of eYFP, which leads to eYFP expression.  
198 Transduction also causes excision of the neomycin resistance gene NeoR (Fig 3a, top). 37 days  
199 post injection, we isolated cells from the v-SVZ and other brain regions as schematically depicted  
200 in Fig 3a. More precisely, we isolated labeled cells of the v-SVZ and the striatum, rostral migratory  
201 stream (RMS) and OB, here referred to as rest of the brain (RoB). To capture the remaining  
202 unlabeled cells of the NSC-lineage in the v-SVZ, we also isolated GLAST<sup>+</sup> v-SVZ cells. Two  
203 samples of two pooled mice each were subjected to scRNA-seq (Fig 3a and Fig S4e-g). Initial  
204 inspection of the resulting 4,572 single cell transcriptomes revealed a segregation of proliferating  
205 cells as indicated by the expression of the proliferation marker protein Ki-67 (Mki67) and  
206 canonical markers of G2/M and S phase (Fig S4h,i). After mitigating the effects of phase  
207 heterogeneity by regression, we obtained a continuous trajectory ranging from NSCs to late NBs  
208 / immature neurons (Fig 3b). Surprisingly, few eYFP<sup>+</sup> off-target cells (sample #1: 9.7%; sample  
209 #2: 2.7%) were captured, consisting of mostly ependymal cells. Cells isolated from RoB are  
210 located at the very end of this trajectory (Fig S4j).

211 Next, we sought to distinguish labeled (eYFP<sup>+</sup> NeoR<sup>-</sup>) cells from unlabeled (eYFP<sup>-</sup> NeoR<sup>+</sup>) cells  
212 in our single cell transcriptomes (Fig 3c, Fig S4k). As expected (Fig 3a, top), eYFP-expressing  
213 cells mostly do not express NeoR, and, *vice versa*, cells expressing NeoR mostly do not express  
214 eYFP. Only very few cells express both eYFP and NeoR (samples #1 and #2: 1.4% and 3.7%),  
215 possibly due to incomplete Cre-mediated excision. Transcripts of the viral Cre-recombinase,  
216 however, were rarely detected and mostly in early stages of the lineage but notably, also in very  
217 few cells at the end of the lineage, indicating an overall very low expression that prevents  
218 estimation of the dilution of viral transcripts along the lineage (Fig S4l). The floxed genes, eYFP  
219 and NeoR exhibited higher expression than the Cre transcript. eYFP was more readily detected

220 than NeoR, but ultimately both genes suffered from the usual “dropout” in scRNA-seq, i.e. the  
221 failure to capture and/or detect transcripts<sup>59</sup>. For a substantial fraction of cells, neither NeoR nor  
222 eYFP was detected. The fraction of such undistinguishable cells was larger in cells with fewer  
223 total detected transcripts such as qNSCs and LNBs (Fig 3c and Fig 3d). To overcome this issue  
224 and estimate AAV1\_P5 transduction efficiency while accounting for total transcript count per cell  
225 and the likely different expression strengths of eYFP and NeoR, we employed maximum  
226 likelihood estimation (Fig 3e, Methods). LNBs (mostly from eYFP<sup>+</sup>-sorted RoB) and ependymal  
227 cells (GLAST<sup>-</sup>) were used as controls since we know that almost all of these cells are transduced.  
228 Overall, we estimated a high transduction efficiency ranging from 46% to 93% for the cell types  
229 of the v-SVZ lineage and estimated 92% to 100% transduction in cells used as controls. Lastly, we  
230 assessed whether the transduced cells show transcriptomic differences arising from the viral  
231 transduction itself. Both eYFP<sup>-</sup> and eYFP<sup>+</sup> aNSCs and TAPs showed high expression of commonly  
232 used G2/M phase marker genes (Fig 3f), which suggests that transduction with AAV1\_P5 does  
233 not affect proliferation. Differential gene expression analysis between eYFP<sup>+</sup> cells and eYFP<sup>-</sup> cells  
234 (Fig 3g) identified only 18 differentially expressed genes, indicating that AAV1\_P5 transduction  
235 affects their transcriptome only mildly. Furthermore, we did not find any concerted upregulation  
236 of viral response genes in this comparison, or when comparing eYFP<sup>+</sup> cells to eYFP<sup>-</sup> NeoR<sup>+</sup> cells  
237 (Fig S4m) or naive v-SVZ lineage cells from<sup>2</sup> (Fig S4n). In conclusion, we have combined scRNA-  
238 seq with lineage tracing using AAV1\_P5 and found that transduction does not affect the expression  
239 of proliferation markers and overall only minimally affects the transcriptomic readout.

240 We next tested whether the transduction efficiency could be further optimized by the selection of  
241 promoter and number of injected vg per mouse. To this end, we now packaged the CMV\_Cre  
242 construct into the AAV1\_P5 capsid and injected either 10<sup>9</sup> vg per mouse as in Fig 2e-j, or an

243 increased concentration of  $10^{10}$  vg per mouse into tdTomato-flox mouse brains (Fig S5a). In all  
244 conditions, tdTomato-labeled cells were detected at high numbers in the v-SVZ, confirming  
245 specific v-SVZ targeting by the AAV1\_P5 capsid (Fig S5b-d). Transduction of cells was over 60  
246 times higher with the CMV\_Cre construct (319.9 cells per section, Fig S5d) than with CAG\_Cre  
247 (4.8 cells per section, Fig 2j) when injecting  $10^9$  vg per mouse. By increasing the number of  
248 injected vg from  $10^9$  to  $10^{10}$ , we were able to further increase the number of labeled cells (Fig S5d)  
249 including NSCs / TAPs and ependymal cells (Fig S5f-g). However, the increased viral load also  
250 moderately increased the proportion of labeled cells located outside of the v-SVZ (Fig S5e).  
251 Overall, we found that increased viral load resulted in higher labeling efficiency as expected, but  
252 at the cost of some regional specificity. This trade-off must be considered when designing future  
253 experiments, e.g. when targeting cells outside the v-SVZ must be absolutely avoided it is advisable  
254 to inject a lower amount of vg. Furthermore, the CMV promoter greatly outperformed the CAG  
255 promoter in our experiment. This result differs from previous studies overexpressing plasmids via  
256 *in utero* electroporation in the mouse brain, which showed a higher efficiency of the CAG than the  
257 CMV promoter<sup>60,61</sup>. We conclude that the CMV promoter should be preferred over CAG when  
258 using AAV1\_P5, injecting  $10^{10}$  vg per mouse or alternatively  $10^9$  when regional specificity is  
259 crucial.

260 We finally assessed the neurogenic function of transduced NSCs *in vivo*. To this end, we assessed  
261 the number of transduced NSCs in the v-SVZ and their neuronal progeny in the OB.  $10^{10}$  vg/mouse  
262 of AAV1\_P5 harboring the CMV\_Cre construct were injected into the lateral ventricles of  
263 tdTomato-flox mice and at 35 dpi, the number of labeled NSCs in the v-SVZ and OB interneurons  
264 was assessed (Fig 4a). We observed a high heterogeneity in the number of labeled cells probably  
265 due to differences in the injection site. One set of animals exhibited a lower number of labeled

266 cells in the SVZ and OB than the other (Fig 4b). While a trend towards a reduced number of  
267 NSCs/TAPs at 35 dpi was detectable, NSCs still remained in the v-SVZ at this late time point (Fig  
268 4c), suggesting that AAV1\_P5 also targeted qNSCs. To estimate the extent of targeting of the NSC  
269 compartment, we took advantage of our previously developed mathematical modeling framework  
270 for stem cell dynamics of v-SVZ<sup>2</sup>. First, we extended our previously established model and  
271 calibrated it to the experimentally observed dynamics of TAPs and OB neurons (see  
272 Supplementary Material: Mathematical Modeling). Instead of fitting the model to average cell  
273 counts across mice, we subdivided the data into two groups, with higher and lower labeling, as  
274 animals with high labeling in the v-SVZ exhibited a much higher number of labeled cells in the  
275 OB than animals with lower labeling (Fig 4d-e). Fitting of the model to the data, assuming that  
276 viral transduction does not affect cell kinetics and that the observed heterogeneity comes from  
277 different numbers of initially labeled NSCs and TAPs, the model indicates that approximately 57%  
278 of NSCs are labeled in the high-label group and 26% of NSCs in the other group (see Supplemental  
279 Material). Moreover, the model indicates that in the low-labeled group, barely any TAP would be  
280 labeled at initial time, whereas in the other group a higher number of TAPs is initially labeled.  
281 Finally, we employed our model to address whether the observed labeling would arise from direct  
282 targeting of qNSCs, aNSCs or both. To this end, we simulated two scenarios where either only  
283 qNSCs or only aNSCs are targeted (Fig 4f). Our simulation indicates that the ratio of labeled  
284 qNSCs to aNSCs reaches the same value in both scenarios after approximately four days, due to  
285 transitions between the quiescent and active state. Altogether comparison of model fit to data is in  
286 line with the hypothesis that the number of initially transduced NSCs and TAPs differs between  
287 the two groups, that the cell dynamics exhibited by transduced cells are comparable to non-  
288 transduced cells and that AAV5\_P1 can target up to 57% of the NSC pool.

289 To validate the model prediction of the label efficiency of the AAV1\_P5 vector, we performed a  
290 FACS quantification experiment to directly assess the percentage of NSC and progeny that is  
291 labeled by the virus 8 days after injection (Fig 4g). 5 months old TiCY mice were injected with  
292  $10^9$  vg/mouse of AAV1\_P5 harboring the CMV\_Cre construct. FACS quantification analysis was  
293 performed as described previously (Fig S3c-d, S6a,b) and the results show 30.46% labeling  
294 efficiency for NSCs (Fig 4h, mean eYFP<sup>+</sup>-percentage of both samples), which is close to the 26%  
295 labeling efficiency predicted by the mathematical model (Supplementary Material: Mathematical  
296 Modeling, Section 3.2). The model also showed a good fit when applied to the FACS  
297 quantification experiment performed to choose the best candidate between AAV1\_P5 and  
298 AAV9\_A2. Moreover, the prediction of a high labeling group was validated by the observed  
299 labeling rate in the single cell transcriptomics analysis (see Supplementary Material: Mathematical  
300 Modeling).

## 301 **Discussion**

302 Altogether, in this study we have performed barcode-based *in vitro* and *in vivo* high-throughput  
303 screenings of two libraries of wt and engineered AAV capsids<sup>50</sup>. Targeting of NSCs and especially  
304 qNSCs has only been demonstrated in the hippocampal dentate gyrus with the capsid AAV r3.45<sup>62</sup>  
305 and the African green monkey isolate AAV4<sup>63</sup>, as well as recently in the v-SVZ using the newly  
306 engineered AAV variant SCH9<sup>39</sup>.

307 Here, we have identified two lead candidates for efficient targeting of NSCs *ex* and *in vivo*. We  
308 particularly characterized the novel capsid AAV1\_P5 as highly region-specific at targeting cells  
309 of the v-SVZ layer, including ependymal cells and NSCs, by IHC, FACS quantification and  
310 scRNA-seq. We moreover show by IHC and scRNA-seq that NSCs targeted with AAV1\_P5 were

311 not noticeably affected in their migration and transcriptome and readily generated OB neurons.  
312 Furthermore, we demonstrate that the engineered capsid AAV1\_P5 also labels qNSCs. We  
313 propose that qNSC labeling can not only be achieved by direct targeting of qNSCs, but also  
314 indirectly through transduction of aNSCs that would later give rise to qNSCs. Indeed, based on  
315 mathematical modeling of FACS counts, we predict that labeled cells redistribute between those  
316 states within less than one week. Therefore, the initial labeling proportion of quiescent to active  
317 NSCs is not crucial when stem cell dynamics are observed on a longer time scale.

318 AAV1\_P5 clearly shows a tropism for the v-SVZ and is unable to migrate further away from this  
319 region, but the molecular mechanism for this tropism is unknown. It was previously shown that  
320 the SCH9 variant binds heparan sulfate proteoglycans and galactose, both of which are present on  
321 NSCs in the v-SVZ<sup>39</sup>. To date, there are only few other cases where such mechanisms underlying  
322 altered viral properties of synthetic AAV capsids have been successfully elucidated<sup>64-67</sup>. One  
323 example is the use of  $\alpha\beta 8$  integrin as receptor for a keratinocyte-specific AAV2<sup>64</sup>. Another  
324 example was reported by several labs who have recently identified an interaction of AAV-PHP.B  
325 (a peptide-modified AAV9) with the GPI-linked protein LY6A<sup>65-67</sup>. Other than these, however,  
326 the receptors or interactions that are targeted by peptide-engineered or shuffled AAV variants  
327 typically remain enigmatic, as do the intracellular mechanisms underlying their novel features.  
328 Hence, identifying the receptor for AAV1\_P5 will be the subject of future studies. In this looming  
329 work, it will then also be interesting to study whether AAV1\_P5 interacts with other host cell  
330 factors which have been identified over the years as critical for transduction with wild-type  
331 capsids, such as the widely used AAV receptor AAVR<sup>68</sup> or intracellular elements such as the  
332 proteasome<sup>69</sup>.

333 As a proof-of-concept, we show that AAV1\_P5-labeling can be combined with scRNA-seq to  
334 characterize the transcriptomes of NSCs and their progeny from different brain regions. This paves  
335 the way for more complex lineage tracing experiments *in vivo*. Recent studies have used CRISPR-  
336 Cas9-induced genomic scars combined with scRNA-seq to enable clonal lineage tracing in  
337 embryonic development<sup>70,71</sup>. AAVs could be used to induce genomic scars in specific cells at  
338 specific time points to enable clonal lineage tracing in adult tissues. We use our scRNA-seq data  
339 to further corroborate our assessment that NSCs are efficiently targeted and remain functional after  
340 transduction. Future studies using electrophysiology are required to assess whether the progeny  
341 generated by transduced NSCs is fully functional and able to integrate into the neuronal circuits of  
342 the OB. We have identified the combination of CMV promoter and AAV1\_P5 capsid as ideally  
343 suited to efficiently transduce NSCs in the v-SVZ. In addition, we think that future experiments  
344 will be needed to unravel and understand the mechanisms governing the properties of our  
345 candidates. Altogether, we believe that our study opens tantalizing avenues to genetically modify  
346 NSCs in their *in vivo* environment for the treatment of CNS disorders or brain tumors.

347



## 348 **Material and Methods**

### 349 **Animals**

350 In this work, the mouse lines C57BL/6N, TdTom-flox [B6-Gt(ROSA)26Sortm14(CAG-  
351 tdTomato)Hze] and TiCY [B6-Tg(Nr2e1-Cre/ERT2)1Gsc  
352 Gt(ROSA)26Sortm1(EYFP)CosFastm1Cgn/Amv] were used. All mice were male and were age-  
353 matched to eight weeks, except for TiCY mice, which were five months old (for FACS  
354 quantification) and three months old (for scRNA-seq). Animals were housed in the animal  
355 facilities of the German Cancer Research Center (DKFZ) at a 12 h dark/light cycle with free access  
356 to food and water. All animal experiments were performed in accordance with the institutional  
357 guidelines of the DKFZ and were approved by the “Regierungspräsidium Karlsruhe”, Germany.

### 358 **AAV Vector Production**

359 The production of the AAV barcoded library was done as previously published<sup>72,73</sup> with some  
360 modifications: 159 distinct barcodes were inserted into the 3' untranslated region of a yellow  
361 fluorescent protein (YFP) reporter under the control of a cytomegalovirus (CMV) promoter and  
362 encoded in a self-complementary AAV genome. Each of the barcodes was assigned to one AAV  
363 capsid from a total of 183 variants, which are described in more detail in the accompanying  
364 manuscript by <sup>50</sup>. Altogether, this library production included 12 AAV-wild types (AAV1 to  
365 AAV9, AVVrh.10, AAVpo.1, AAV12) and 94 peptide display mutants, 71 capsid-chimeras,  
366 which were created by DNA family shuffling. Isolation of synthetic capsids were performed in  
367 specific tissues or in our recent screens of AAV libraries in cultured cells, in mouse liver tissue or  
368 muscle<sup>74</sup>. These synthetic capsids include a set of 12 AAV serotypes, that were previously  
369 modified by insertion of over 20 different peptides in exposed capsid loops and that were recently

370 characterized in established or primary cells<sup>74</sup>. In the work of <sup>50</sup>, all barcoded capsids were pooled  
371 in different combinations to finally obtain three distinct libraries (#1, #2 (not used in the present  
372 work) and #3), with 91, 82 and 157 variants. Further details on library composition are found in  
373 the Supplement of <sup>50</sup>. All capsid variants are detailed in Table S4. HEK293T cells were cultured  
374 in DMEM (Gibco) supplemented with 10% fetal bovine serum (Merck), 1%  
375 penicillin/streptomycin (Gibco, 10000 U/ml pen, 10000 µg/ml strep) and 1% L-Glutamine (Gibco,  
376 200 mM) at 37°C and 5% CO<sub>2</sub>. AAV vectors were produced by seeding HEK293T cells (4.5x10<sup>6</sup>  
377 cells per dish) on 90-150 Ø15cm tissue culture dishes (Sigma). Two days later, we performed a  
378 polyethylenimine (PEI; Polyscience) triple transfection by mixing 44.1 µg (3x14.7 µg) DNA of i)  
379 a plasmid containing the recombinant AAV genome of interest ii) an AAV helper plasmid carrying  
380 AAV *rep* and *cap* genes and iii) a plasmid providing adenoviral helper functions for AAV  
381 production in a total volume of 790 µl H<sub>2</sub>O per culture dish. Separately, PEI (113.7 µg) and H<sub>2</sub>O  
382 were mixed in a total volume of 790 µl per dish and NaCl (300 nM) was added 1:1 to both, PEI or  
383 DNA solution. PEI was added dropwise to DNA and incubated for 10 min at room temperature,  
384 before finally adding the DNA/PEI mixture to the culture dish. Three days later, cells were scraped  
385 off in the media and collected by centrifugation (400 g, 15 min). The pellet was dissolved in 0.5  
386 ml virus lysis solution (50 mM TrisHCl; Sigma), 2 mM MgCl<sub>2</sub> (Sigma), 150 mM NaCl  
387 (ThermoFisher; pH 8.5) and was immediately frozen at -80°C. In total, 5x freeze-thaw cycles were  
388 performed with the cell pellet prior to sonication for 1 min 20 sec. The cell lysate was treated with  
389 Benzonase (75 U/µl; Merck) for 1h at 37°C, followed by a centrifugation step at 4000 g for 15  
390 min. CaCl<sub>2</sub> was added to a final concentration of 25 mM and the solution was incubated for 1 h on  
391 ice, followed by centrifugation at 10000 g for 15 min at 4°C. The supernatant was harvested and  
392 a ¼ volume of a 40% polyethylene glycol (PEG 8000; BioChemica) and 1.915 M NaCl

393 (ThermoFisher) solution was added prior to incubation for 3 h on ice. After centrifugation for 30  
394 min at 2500 g and 4°C, the pellet was dissolved in resuspension buffer (50 mM HEPES; Gibco),  
395 0.15 M NaCl (ThermoFisher), 25 mM EDTA (Sigma) and was dissolved overnight. The solution  
396 was then centrifuged for 30 min at 2500 g and 4°C, and the supernatant was mixed with cesium  
397 chloride (CsCl; Sigma) to a final concentration of 0.55 g/ml. The refractive index was adjusted to  
398 1.3710 using additional CsCl or buffer, as needed. Next, the vector particles were purified using  
399 CsCl gradient density centrifugation. Fractions with a refractive index of 1.3711 to 1.3766  
400 comprising DNA-containing AAV particles were pooled and dialyzed against 1x PBS with a Slide-  
401 A-Lyzer dialysis cassette according to the manufacturer's instructions (ThermoFisher).  
402 Subsequently, the samples were concentrated by using an Amicon® Ultra Centrifugal Filter  
403 (Millipore; 100000 NMWL) following the manufacturer's instructions. The volume of the samples  
404 was reduced to 250-300 µl. AAV vectors were finally aliquoted and stored at -80°C.

405 The production of the AAV1\_P5\_YFP and AAV9\_A2\_YFP viruses for the FACS analysis  
406 experiment was done as described above, with the only modification that the vectors were purified  
407 using two Iodixanol gradients. Of note, the barcoded AAV library construct as well as the YFP-  
408 construct were engineered as double-stranded AAV vectors. The constructs for CAG\_Cre::GFP  
409 and CMV\_Cre were engineered as a single-stranded AAV vector.

#### 410 **AAV Vector Titration**

411 AAV vectors were titrated using quantitative real-time PCR (qRT-PCR) as described in<sup>75</sup>. For the  
412 CAG\_Cre::GFP construct, the primers and probe GFP\_fwd, GFP\_rev and GFP\_probe were used,  
413 while Cre\_fwd, Cre\_rev and Cre\_probe were used for the CMV\_Cre construct (Table S1). The  
414 qPCR was performed on a C1000 Touch Thermal Cycler equipped with a CFX384 Real-Time

415 System (Bio Rad) with the following conditions: initial melting for 10 min at 95°C, followed by  
416 40 cycles of denaturation for 10 s at 95°C and annealing/extension for 30 s at 55°C. A standard  
417 curve was considered as reliable when  $R^2$  was greater than 0.985.

#### 418 **Stereotactic Injection**

419 AAV vectors were stereotactically injected into the lateral ventricle by using the following  
420 coordinates calculated to bregma: Anterior-posterior (AP) -0.5 mm, Medio-lateral (ML) -1.1 mm,  
421 Dorso-ventral (DV) 2.4 mm. Mice received either  $10^9$  or  $10^{10}$  vg/mouse in a total volume of 10  $\mu$ l.  
422 The AAV libraries were stereotactically injected into the lateral ventricle by using the following  
423 coordinates calculated to bregma: AP -0.5 mm, ML -1.1 mm, DV 2.4 mm. Mice received  $4 \times 10^{10}$   
424 vg/mouse in a total volume of 2  $\mu$ l. *Ex vivo* manipulated cells (7000 FACS events) were injected  
425 into two areas of the v-SVZ using the following coordinates calculated to bregma: AP 0.7 mm,  
426 ML 1.6 mm, DV 2 mm and AP 0 mm, ML 1.7 mm, DV 2 mm.

#### 427 **Cell Isolation and *in vitro* Cultivation**

428 The lateral v-SVZ was micro-dissected as whole mount as previously described<sup>76</sup>. Tissue of single  
429 mice was digested with trypsin and DNase according to the guidelines of the Neural Tissue  
430 Dissociation Kit (T) (Miltenyi Biotec) using a Gentle MACS Dissociator (Miltenyi Biotec). Cells  
431 were cultured and expanded for 8-12 days in Neurobasal medium (Gibco) supplemented with B27  
432 (Gibco), heparin (Sigma), glutamine (Gibco), Pen/Strep (Gibco), EGF (PromoKine) and FGF  
433 (PeloBiotech) as reported in<sup>77</sup>.

#### 434 ***In vitro* Transduction of Cultured NSCs**

435 For RNA sequencing, NSCs were seeded in 48-well plates (Greiner Bio-One) and incubated  
436 overnight. AAV library #1 or library #3 (same libraries as in<sup>50</sup>, multiplicity of infection (MOI):

437 10000) were added to the media and remained for the duration of seven days. For IHC, Labtek  
438 chambers (ThermoFisher) were coated with PDL (Sigma) / Laminin (Sigma) and NSCs were  
439 seeded at a density of  $2 \times 10^4$  cells per  $\text{cm}^2$  overnight. AAVs were added (MOI: 10000) and  
440 remained in the media for 1, 3, 5 or 7 days.

#### 441 **Single-cell transcriptomic profiling by 10X Chromium 3' sequencing**

#### 442 **Stereotactic injection, single cell suspension preparation and sorting**

443 Three months old TiCY mice were stereotactically injected into the lateral ventricle with  $10^9$  vg  
444 of the AAV1\_P5\_Cre capsid. After 5 weeks of chase time, the mice were sacrificed and the SVZ,  
445 striatum, rostral migratory stream and olfactory bulb was isolated. The latter three tissues were  
446 pooled as a single tube and were named Rest of the Brain (RoB). From these tissues a single cell  
447 suspension was prepared as described before (Cell Isolation and in vitro Cultivation section). From  
448 the SVZ the cells sorted were eYFP<sup>+</sup> (O4/CD45/Ter119 negative, eYFP positive) and, from the  
449 eYFP negative cells, only Glast<sup>+</sup> cells. From the RoB only eYFP<sup>+</sup> cells were sorted. The total  
450 number of sorted events for the 2 days of the experiment were 12000 for SVZ cells and 5800 for  
451 cells of the RoB. 2 TiCY mice were pooled for each sorting day. All the cells were sorted in a  
452 volume of 50  $\mu\text{l}$  of Fetal Calf Serum (FCS) 10% in PBS, from which 45  $\mu\text{l}$  were used for loading  
453 the Chromium Next GEM Chip G.

#### 454 **Library preparation, sequencing, and mapping**

455 One library per each sorting day was prepared by following the manufacturer's protocol  
456 (Chromium Next GEM Single Cell 3' v3.1) and sequenced on a NovaSeq 6K PE 100 S1.

457 In order to quantify eYFP and NeoR (Neomycin / Kanamycin resistance gene) expression, entries  
458 for these transgenes were manually added to the FASTA and GTF files of the mouse reference

459 genome mm10-3.0.0 provided by 10X Genomics. scRNA-seq reads were pseudoaligned and  
460 further processed with kallisto|bustools<sup>78,79</sup> to generate a gene×barcode count matrix.

#### 461 **Computational analysis of single cell RNA-seq data**

462 Cell barcodes with less than 1500 UMIs or more than 15% mitochondrial reads were filtered and  
463 the remaining cells were further analyzed in Scanpy v1.5.1<sup>80</sup>. We used Scanpy to calculate G2/M  
464 and S phase scores for all cells, based on their expression of G2/M and S phase marker genes from  
465 <sup>81</sup>. These scores were then regressed out of the count data, to reduce the influence of the cell cycle  
466 on clustering. The first 50 principal components of 3324 highly variable genes were used for 2D  
467 visualization with UMAP (n\_neighbors=35) and cell clustering with the Leiden algorithm  
468 (resolution=0.5). Cell clusters were assigned to cell types based on the expression of marker genes  
469 as previously described in<sup>2</sup>. To identify the location of cells from RoB, kernel density estimates of  
470 cell density in 2D UMAP space were calculated for both samples. Since sample #1 contains more  
471 RoB cells and sample #2 contains more v-SVZ cells, we subtracted both densities to highlight cells  
472 that most likely stem from RoB (orange cells in Fig S4h).

473 In order to estimate transduction efficiency from scRNA-seq data, we use the following model,  
474 based on the usual approach of modeling RNA-seq counts by the negative binomial (NB)  
475 distribution:

476 For non-transduced cells, we assume that they express NeoR such that an expected fraction  $\mu_R$  of  
477 all their mRNA transcripts originate from this gene. For each individual cell  $j$ , the actual  
478 expression strength  $q_j^R$  of the gene varies around this expectation according to a gamma  
479 distribution with mean  $\mu_R$  and variance  $\alpha_R \mu_R$ . The observed number of UMIs is then modelled as  
480 a Poisson variable:  $k_j^R | q_j^R \sim \text{Pois}(s_j q_j^R)$ , where  $s_j$  is the total UMI count for cell  $j$ , summed over

481 all genes. Marginalizing out  $q_j^R$ , we find  $k_j^R$  to follow a NB distribution with mean  $s_j\mu_R$  and  
482 dispersion  $\alpha_R$ . As we are looking at a non-transduced cell, the UMI count  $k_j^Y$  for eYFP is, of course,  
483 zero.

484 Similarly, we write  $k_j^Y$ ,  $\mu_Y$  and  $\alpha_Y$  for the corresponding quantities of eYFP, expressed by  
485 transduced cells. For a fully transduced cell  $j$ , we therefore have  $k_j^Y \sim \text{NB}(s_j\mu_Y, \alpha_Y)$ , but  $k_j^R = 0$   
486 . For transduced cells with incomplete or heterozygous Cre-mediated excision, we should see both  
487 genes expressed, but will model the expression strength to be only half as strong.

488 The likelihood of observing UMI counts  $k_j^R$  and  $k_j^Y$  for a given cell  $j$  therefore depends on the  
489 parameters just mentioned as well as on the probabilities  $p_U$  that the cell is not transduced,  $p_T$  that  
490 it is fully transduced, and  $p_P = 1 - p_U - p_T$  that it is partially transduced. We write the likelihood  
491 as

$$L_j = p_U f_{\text{NB}}(k_j^R; \mu_R, \alpha_R) \delta(k_j^Y) +$$
$$+ p_T \delta(k_j^R) f_{\text{NB}}(k_j^Y; \mu_Y, \alpha_Y) +$$
$$+ p_P f_{\text{NB}}(k_j^R; \mu_R/2, \alpha_R) f_{\text{NB}}(k_j^Y; \mu_Y/2, \alpha_Y),$$

492

493 where  $f_{\text{NB}}(k; \mu, \alpha)$  is the probability to observe  $k$  counts under a negative binomial distribution  
494 with mean  $\mu$  and dispersion  $\alpha$ , and  $\delta$  is the zero indicator function, i.e.,  $\delta(k) = 0$  for  $k \neq 0$  but  
495  $\delta(0) = 1$ .

496 Given all the  $k_j$  and  $s_j$ , we obtain estimates for the transduction efficiency  $p_T$  and for  $p_U$  and  $p_P$  as  
497 well as for the nuisance parameters  $\mu_R$ ,  $\alpha_R$ ,  $\mu_Y$ , and  $\alpha_Y$  by numerically maximizing the log

$$l = \sum_j \log L_j$$

498 likelihood using the R function `optim`.

499 We mention two technical details: First, in order to give all optimization parameters full domain  
500 over all of  $\mathbb{R}$ , we used parameter transformations in the optimization, namely exponentiating the  
501  $\mu$ s and  $\alpha$ s, and logit-transforming the probabilities  $p$  and  $q$  obtained from reparametrizing  
502  $p_T = p(1 - q)$ ,  $p_U = 1 - p$ ,  $p_P = pq$ . Second, in order to improve identifiability in case of low  
503 values for  $p_U$ , we enforced a minimum value for  $\mu_R$  by adding to the likelihood a penalty term  
504  $f_{\text{pty}}(\mu_R)$ , where  $f_{\text{pty}} = 1/(1 + e^{9 \times 10^5 x - 9})$  is a sigmoid that vanishes for  $\mu_R \gtrsim \mu_{R_{\text{min}}} = 2 \times 10^{-5}$ .

505 Differential gene expression was assessed by summing UMI counts of cells within a group to yield  
506 pseudobulk samples for testing in DESeq2 v1.29.7<sup>82</sup>. eYFP<sup>+</sup> cells were tested against both eYFP<sup>-</sup>  
507 cells and eYFP<sup>-</sup> NeoR<sup>+</sup> cells. Testing eYFP<sup>+</sup> vs. eYFP<sup>-</sup> has the advantage of greater statistical  
508 power due to higher cell numbers, but some eYFP<sup>-</sup> cells may be transduced cells with eYFP-  
509 dropout. Thus, we performed both comparisons, yielding similar results. To account for the  
510 unequal distribution of eYFP<sup>+</sup> and eYFP<sup>-</sup> cells along the lineage (Fig S4h), pseudobulk groups  
511 were formed per cluster and sample, and the cluster identity was added as a covariate in DESeq2.  
512 To enable comparison of v-SVZ cells from <sup>2</sup> with our eYFP<sup>+</sup> cells, both datasets were integrated  
513 with Seurat's SCTransform integration workflow<sup>83</sup> using our cells as reference. The integrated  
514 dataset was clustered and differential expression was assessed as above, using the shared clusters  
515 as covariate. Genes with the gene ontology term "GO:0009615 - response to virus" were  
516 highlighted.

## 517 **FACS-Sorting**

518 Generation of single-cell suspension was performed as described in <sup>7</sup>. Cells were stained with the  
519 following antibodies: O4-APC and O4-APC-Vio770 (Miltenyi; diluted 1:50), Ter119-APC-Cy7  
520 (Biologend; 1:100), CD45-APC-Cy7 (BD; 1:200), GLAST (ACSA-1)-PE (Miltenyi: 1:20), CD9-



521 eFluor450 (eBioscience: 1:300), Alexa647::EGF (Life Technologies, 1:100), PSA-NCAM-PE-  
522 Vio770 (Miltenyi; 1:75), Prominin1-PerCP-eFluor 710 (eBioscience; 1:75), CD24-PE-Cy7  
523 (eBioscience; 1:75), and Sytox Blue (Life Technologies, 1:1000). For RNA sequencing, cells were  
524 directly sorted into 100  $\mu$ l of the PicoPure RNA Isolation Kit (ThermoFisher) extraction buffer.  
525 For *ex vivo* transduction, NSCs were sorted into growth-factor-free NBM medium.

### 526 **FACS Analysis of AAV-injected mice**

527 FACS Analysis for testing the transduction efficiency of the candidate viruses was performed by  
528 two methods. The first method consisted of injecting 5 months old TiCY mice with the  
529 AAV1\_P5\_Cre virus and after 8 days SVZ and OB cells were FACS sorted and analyzed (Fig 4g-  
530 h). In the second method we injected 2 months old C57BL/6N mice with AAV1\_P5\_YFP and  
531 AAV9\_A2\_YFP viruses and analyzed them after 6 days (Fig S3c-d).

532 For FACS Quantification of AAV-injected NSC/Progeny, cells were sorted with the following  
533 antibodies: O4-APC-Vio770 (Miltenyi; diluted 1:100), CD45-APC-Cy7 (BD; 1:200), Ter119-  
534 APC-Cy7 (Biologend; 1:100), GLAST (ACSA-1)-PE (Miltenyi: 1:50), Prominin1-APC  
535 (eBioscience, 1:75), PSA-NCAM-PE-Vio770 (Miltenyi; 1:50), Texas-Red::EGF (Life  
536 Technologies, 1:75).

### 537 ***Ex vivo* Treatment of NSCs**

538 FACS-sorted NSCs were transduced with AAV (MOI: 10000) and incubated on ice for 2-3 h. Cells  
539 were centrifuged for 15 min at 300 g, 4°C and were washed twice with PBS. The pellet was  
540 dissolved in 4  $\mu$ l PBS.

### 541 **RNA Isolation and cDNA Synthesis**

542 RNA was isolated by using the PicoPure RNA Isolation Kit (ThermoFisher). For RNA isolation  
543 of *in vitro* transduced cells, 1500 cultured NSCs per set were lysed in 100 µl extraction buffer. For  
544 isolation of FACS-sorted *in vivo* transduced cells, batches of 500 cells or less were generated and  
545 were lysed in 100 µl extraction buffer. Up to 6 batches (2500 cells) were obtained per set,  
546 depending on the cell type (Table S2, Table S3). The cell-containing extraction buffer was  
547 incubated for 30 min at 42°C and the lysate was frozen at -80°C to increase the amount of isolated  
548 RNA. The cell lysate was mixed 1:1 with 70% ethanol and RNA was extracted according to the  
549 guidelines of the PicoPure RNA Isolation Kit (ThermoFisher). RNA was dissolved in 11 µl  
550 nuclease-free H<sub>2</sub>O. The cDNA synthesis was performed as described in<sup>84</sup> by using Locked Nucleic  
551 Acid-TSO (Table S1) and by using either 14 cycles for *in vitro* cultured NSCs, 15 cycles (>300  
552 cells per batch) or 16 cycles (<300 cells per batch) for FACS-sorted *in vivo* transduced cells for  
553 the cDNA enrichment step. After purification<sup>84</sup> using AMPure XP beads (Beckman Coulter),  
554 cDNA was dissolved in 10µl H<sub>2</sub>O.

### 555 **Barcode Amplification PCR and NGS Library Preparation**

556 Barcodes were PCR-amplified by using 10 ng cDNA as input material. Therefore, the PCR primers  
557 Bar\_fwd and Bar\_rev that bind up and downstream of the 15bp long Barcodes within the according  
558 cDNA were engineered and the Phusion High-Fidelity DNA Polymerase (ThermoFisher) was used  
559 according to its manual in combination with 10 mM dNTPs (ThermoFisher) (Table S1). The PCR  
560 was performed on a T100 Thermal Cycler (Bio Rad) with the following conditions: initiation for  
561 30 s at 98°C, followed by 35 cycles of denaturation for 10 s at 98°C, annealing/extension for 20 s  
562 at 72°C and a final step for 5 min at 72°C. The result was a 113bp long PCR amplicon that includes  
563 the Barcode with its 15bp long random DNA-sequence. The PCR amplicon was AMPure XP bead-

564 purified (Beckman coulter)<sup>84</sup> with a bead:sample ratio of 0.8:1 in the first round and 1:1 in the  
565 second round. After this step, the samples were enriched for the Barcode containing amplicon and  
566 of course the samples potentially contained the range of up to 157 different AAV Barcodes which  
567 were initially used. Next, 10 ng or 15 ng (library #1 or #3, respectively) of PCR amplicon was  
568 used for NGS library preparation with the NEBNext ChIP-Seq Library Prep Reagent Set for  
569 Illumina (NEB) for samples from library #1 and the NEBNext Ultra II DNA Library Prep Kit for  
570 Illumina (NEB) for samples from library #3. Multiplexed libraries were generated by following  
571 the manual and by using the NEBNext Multiplex Oligos for Illumina (NEB). All multiplexed  
572 samples for library #1 and library #3 are listed in Table S2 and Table S3. For sequencing, up to  
573 50% of PhiX were spiked in to increase the complexity of the library.

#### 574 **Immunocytochemistry**

575 Cells were washed 3x 5 min in PBS at room temperature, followed by a 30 min blocking step in  
576 PBS<sup>++</sup> (PBS with 0.3% horse serum (Millipore) and 0.3% Triton-X100 (Sigma)) at room  
577 temperature. Subsequently, the cells were incubated overnight in PBS<sup>++</sup> containing primary  
578 antibodies at 4°C. Cells were washed in PBS for 3x 5 min at room temperature and were incubated  
579 with secondary antibodies in PBS<sup>++</sup> for 1 h in the dark at room temperature. Afterwards, cells were  
580 washed 3x 5 min in PBS and were mounted with Fluoromount G (eBioscience). The following  
581 antibodies were used: chicken anti-GFP (Aves; 1:1000) and goat anti-mCherry (SICGEN; 1:1000).  
582 Nuclei were counterstained with Hoechst 33342 (Biotrend; 1:3000).

#### 583 **Tissue Preparation**

584 Animals were sacrificed by using an overdose of Ketamine (120 mg/kg) / Xylazine (20 mg/kg)  
585 and were subsequently transcardially perfused with ice-cold 20ml 1xHBSS (Gibco) and 10ml of

586 4% paraformaldehyde (Carl Roth). The brains were dissected and postfixed in 4%  
587 paraformaldehyde overnight at 4 °C. A Leica VT1200 Vibratome was used to cut the tissue in 50  
588  $\mu\text{m}$  (v-SVZ) or 70  $\mu\text{m}$  (OB) thick coronal sections. From each mouse, three to six identical brain  
589 sections every 100  $\mu\text{m}$  (v-SVZ) or 140  $\mu\text{m}$  (OB) along the coronal axis were used for staining.  
590 Brain sections for staining the v-SVZ were harvested from 0.5-1.1 mm anterior to the bregma.

### 591 **Immunohistochemistry**

592 Brain sections were washed 4x 10 min in TBS at room temperature, followed by a 1 h blocking  
593 step in TBS<sup>++</sup> (TBS with 0.3% horse serum (Millipore) and 0.3% Triton-X100 (Sigma)) at room  
594 temperature. The tissue was transferred to 0.5ml Safe Lock Reaction-Tubes containing 200  $\mu\text{l}$   
595 TBS<sup>++</sup> including primary antibodies. Samples were incubated for 24-48 h at 4°C. Tissue samples  
596 were washed 4x 10 min in TBS at room temperature, followed by a 30 min blocking step in TBS<sup>++</sup>  
597 at room temperature. Brain sections were transferred to 0.5 ml Safe Lock Reaction-Tubes  
598 containing 200  $\mu\text{l}$  TBS<sup>++</sup> including secondary antibodies. Samples were incubated in the dark for  
599 2 h at room temperature. Subsequently, brain slices were washed 4x 10 min in TBS at room  
600 temperature and were mounted on glass slides with Fluoromount G (eBioscience). The following  
601 antibodies were used: mouse anti-Sox2 (Abcam; 1:100), guinea pig anti-DCX (Merck; 1:400),  
602 rabbit anti-S100b (Abcam; 1:100), goat anti-mCherry (SICGEN; 1:1000) and chicken anti-GFAP  
603 (GeneTex; 1:500). Nuclei were counterstained with Hoechst 33342 (Biotrend; 1:3000).

### 604 **Microscopy and Cell Quantification**

605 All images were acquired with a Leica TCS SP5 AOBS confocal microscope equipped with a UV  
606 diode 405 nm laser, an argon multiline (458-514 nm) laser, a helium-neon 561 nm laser, and a  
607 helium-neon 633 nm laser. Images were acquired as multichannel confocal stacks (z-plane distance

608 3  $\mu\text{m}$ ) in 8-bit format by using a 20x or 40x oil immersion objective at a resolution of 1024x1024  
609 and 200Hz. For quantification of the v-SVZ and total brain sections, tile scans of the whole  
610 ventricle or the whole coronal brain section were acquired with a total z-stack size of 25 $\mu\text{m}$ . To  
611 quantify the OB, tiles cans of the whole OB covering the tissue thickness were acquired. For  
612 stained cells from *in vitro* culture, 4-9 fields of view were imaged. For representative images  
613 (2048x2048 resolution, 100Hz), the maximum intensity of a variable number of z-planes was  
614 stacked to generate the final z-projections. Representative images were cropped, transformed to  
615 RGB color format, and assembled into figures with Inkscape (inkscape.org). For cell  
616 quantification, ImageJ (NIH) was used including the plug-in cell counter to navigate through the  
617 z-stacks. To quantify cells in the OB, the volume of the OB was calculated by multiplying the  
618 entire area of every OB section (including the glomerular layer; GLL) with the entire z-stack size.  
619 Then we converted  $\mu\text{m}^3$  to  $\text{mm}^3$ . Finally, cell counts were given as cells/ $\text{mm}^3$  OB. To elucidate the  
620 labeling efficiency of the different AAV variants in the total v-SVZ (medial, dorsal, and lateral  
621 wall of the lateral ventricle), the cells were counted on 25  $\mu\text{m}$  thick coronal sections and are given  
622 as cells per 25  $\mu\text{m}$  section. Mainly NSCs located in the lateral wall of the ventricle generate OB  
623 neurons during homeostasis. Since a particular area of the lateral v-SVZ serves cells to a particular  
624 volume of the OB, cell numbers were counted for the mathematical modeling of the lateral v-SVZ  
625 only. The length of the lateral ventricular wall was measured in a coronal section and multiplied  
626 with the z-stack size (25  $\mu\text{m}$ ), to estimate the area of the lateral v-SVZ. Afterwards, cells in the  
627 lateral v-SVZ were counted and normalized to the lateral v-SVZ area. Data are given as cells per  
628  $\text{mm}^2$ .

## 629 **NGS-screening of Barcoded AAV Capsid Variants - Computational Analysis**

630 NGS-samples were sequenced and demultiplexed by the DKFZ Genomics and Proteomics Core  
631 Facility using bcl2fastq 2.19.0.316. This resulted in two (paired-end) FASTQ-files per sample.  
632 Each FASTQ consists of reads resulting from the targeted barcode amplification and up to 50%  
633 PhiX DNA that was spiked in to increase library complexity.

634 Each AAV variant is associated with a unique 15-mer barcode sequence. To quantify the most  
635 successful AAV, we simply counted how often each barcode occurred in each FASTQ file, bearing  
636 in mind the following pitfalls:

- 637 1. barcode-sequences might occur outside of the amplicon by chance, e.g. in the PhiX  
638 genome
- 639 2. barcodes might have sequencing errors
- 640 3. barcodes occur on the forward and reverse strand

641 To circumvent issues 1 and 2, we opted for a strategy where we only count barcodes matching the  
642 expected amplicon structure. This was achieved with the following regex (regular expression;  
643 defines a text search pattern):  
644 `(?<=[NGCAT]{33}TGCTC)[NGCAT]{15}(?=CAGGG[NGCAT]{45})`. Variable 15-mers  
645 `[NGCAT]{15}` are only counted if they are flanked by the expected regions TGCTC and CAGGG.  
646 Furthermore, we enforce a minimum of 33 upstream nucleotides and 15 downstream nucleotides,  
647 in addition to the flanking regions, to only count 15-mers at the expected position. 15-mers  
648 matching this regex were extracted and counted with the standard GNU command-line tools grep,  
649 sort and uniq. 15-mers sequenced from the reverse strand were counted with an equivalent reverse  
650 complement regex and added to the forward counts.

## 651 **Assigning Barcodes to AAV Capsids**

652 Raw 15-mer counts were further processed in R. Most observed 15-mers matched a known barcode  
653 exactly (library #1: 74%, library #3: 87%), which allowed us to assign them to a unique AAV  
654 variant. The remaining 15-mer counts were added to the counts of the closest known barcode,  
655 allowing for a maximum of two mismatches.

## 656 **Normalization**

657 Each sequenced sample corresponds to one tube with up to 500 FACS-sorted cells. To downweigh  
658 samples with lower cell numbers, barcode counts were scaled by the respective number of FACS  
659 events (usually 500, Supplementary Table 2). Barcode counts of the same cell type and biological  
660 replicate (termed “sets”) were then summed. The AAV libraries used for transduction contain  
661 slightly unequal proportions of AAV variants, which means that some AAV variants may have an  
662 advantage due to increased starting concentration. To remedy this problem, barcode counts were  
663 further scaled by their abundance in the transduction library (as determined by <sup>50</sup>), so that barcode  
664 counts corresponding to more frequent AAV capsids were decreased and vice versa.

665 To account for sequencing depth of the individual samples, normalized barcode counts were  
666 divided by the total number of valid barcodes in that sample, yielding normalized barcode  
667 proportions. A potential source of bias is that amplicons with different barcodes may have different  
668 RT-PCR efficiencies. A previous study <sup>49</sup> on ten barcoded AAV variants found no such bias, but  
669 nonetheless we evaluated one possible source of bias, barcode GC-content, in our own data. We  
670 found no significant association between barcode GC-content and mean barcode proportion across  
671 all samples in either library (Fig S2 l-m).

## 672 **Identification of Candidate AAVs With High Transduction Efficiency**

673 To identify the most promising AAV variants, AAVs were ranked by the mean normalized barcode  
674 proportion within and across cell types (Figure 1d-j). AAV1\_P5 and AAV9\_A2 performed  
675 consistently well across replicates of both experiments and were selected for further validation.

## 676 **Mathematical Modeling**

677 A detailed description on how the mathematical modeling was developed is given in the  
678 Supplementary Material section.

## 679 **Statistics**

680 Statistical analyses were performed with R version 4.0.2 using one-way ANOVA followed by  
681 Tukey's Honest Significant Difference (HSD) post-hoc test unless otherwise noted. Tukey's HSD  
682 p-values were corrected for multiple testing with the Benjamini-Hochberg procedure. The  
683 homogeneity of variance assumption of ANOVA was assessed with Levene's test and the  
684 normality assumption was assessed with the Shapiro-Wilk normality test. The respective p-values  
685 are indicated in the figure legends. Figures were plotted with the R package ggplot2 and SigmaPlot  
686 12.5.

## 687 **Data and Code Availability**

688 All sequencing data is available at the NCBI Gene Expression Omnibus (GEO) under the accession  
689 GSE145172.

690 All scripts used in the analysis are available at <https://github.com/LKremer/AAV-screening>.

## 691 **Acknowledgements**



692 We thank Monika Langlotz and the ZMBH FACS Core Facility; the DKFZ High Throughput  
693 Sequencing Unit; the DKFZ Microscopy Core Facility; Ellen Wiedtke and the members of the  
694 Dirk Grimm laboratory for technical assistance; Stefanie Limpert for technical assistance and the  
695 members of the Martin-Villalba laboratory for critically reading the manuscript.

## 696 **References**

- 697 1. Lim, D. & Alvarez-Buylla, A. The Adult Ventricular – Subventricular Zone and Olfactory  
698 bulb Neurogenesis. *Cold Spring Harb. Perspect. Biol.* **8**, a018820 (2016).
- 699 2. Kalamakis, G. *et al.* Quiescence Modulates Stem Cell Maintenance and Regenerative  
700 Capacity in the Aging Brain. *Cell* **176**, 1407-1419.e14 (2019).
- 701 3. Ming, G. & Song, H. Adult Neurogenesis in the Mammalian Brain: Significant Answers  
702 and Significant Questions. *Neuron* **70**, 687–702 (2011).
- 703 4. Merkle, F. T., Mirzadeh, Z. & Alvarez-Buylla, A. Mosaic organization of neural stem  
704 cells in the adult brain. *Science* **317**, 381–384 (2007).
- 705 5. Fuentealba, L. C. *et al.* Embryonic Origin of Postnatal Neural Stem Cells. *Cell* **161**, 1644–  
706 1655 (2015).
- 707 6. Merkle, F. T. *et al.* Adult neural stem cells in distinct microdomains generate previously  
708 unknown interneuron types. *Nat. Neurosci.* **17**, 207–214 (2014).
- 709 7. Llorens-Bobadilla, E. *et al.* Single-Cell Transcriptomics Reveals a Population of Dormant  
710 Neural Stem Cells that Become Activated upon Brain Injury. *Cell Stem Cell* **17**, 329–340  
711 (2015).

- 712 8. Arvidsson, A., Collin, T., Kirik, D., Kokaia, Z. & Lindvall, O. Neuronal replacement from  
713 endogenous precursors in the adult brain after stroke. *Nat. Med.* **8**, 963–970 (2002).
- 714 9. Parent, J. M., Vexler, Z. S., Gong, C., Derugin, N. & Ferriero, D. M. Rat forebrain  
715 neurogenesis and striatal neuron replacement after focal stroke. *Ann. Neurol.* **52**, 802–813  
716 (2002).
- 717 10. Thored, P. *et al.* Persistent Production of Neurons from Adult Brain Stem Cells During  
718 Recovery after Stroke. *Stem Cells* **24**, 739–747 (2006).
- 719 11. Hou, S. W. *et al.* Functional integration of newly generated neurons into striatum after  
720 cerebral ischemia in the adult rat brain. *Stroke* **39**, 2837–2844 (2008).
- 721 12. Liu, F. *et al.* Brain injury does not alter the intrinsic differentiation potential of adult  
722 neuroblasts. *J. Neurosci.* **29**, 5075–5087 (2009).
- 723 13. Enikolopov, G., Overstreet-Wadiche, L. & Ge, S. Viral and transgenic reporters and  
724 genetic analysis of adult neurogenesis. *Cold Spring Harb. Perspect. Biol.* **7**, 1–17 (2015).
- 725 14. Thomas, C. E., Ehrhardt, A. & Kay, M. A. Progress and problems with the use of viral  
726 vectors for gene therapy. *Nat. Rev. Genet.* **4**, 346–358 (2003).
- 727 15. Li, Z. *et al.* Murine leukemia induced by retroviral gene marking. *Science* **296**, 497  
728 (2002).
- 729 16. Hacein-Bey-Abina, S. *et al.* A Serious Adverse Event after Successful Gene Therapy for  
730 X-Linked Severe Combined Immunodeficiency. *N. Engl. J. Med.* **348**, 255–256 (2003).
- 731 17. Xia, X., Zhang, Y., Zieth, C. R. & Zhang, S. C. Transgenes delivered by lentiviral vector

- 732 are suppressed in human embryonic stem cells in a promoter-dependent manner. *Stem*  
733 *Cells Dev.* **16**, 167–176 (2007).
- 734 18. He, J., Yang, Q. & Chang, L.-J. Dynamic DNA Methylation and Histone Modifications  
735 Contribute to Lentiviral Transgene Silencing in Murine Embryonic Carcinoma Cells. *J.*  
736 *Viol.* **79**, 13497–13508 (2005).
- 737 19. Park, F., Ohashi, K., Chiu, W., Naldini, L. & Mark A, K. Efficient lentiviral transduction  
738 of liver requires cell cycling in vivo. *Nat. Genet.* **24**, 49–52 (2000).
- 739 20. Hocquemiller, M., Giersch, L., Audrain, M., Parker, S. & Cartier, N. Adeno-Associated  
740 Virus-Based Gene Therapy for CNS Diseases. *Hum. Gene Ther.* **27**, 478–496 (2016).
- 741 21. Deverman, B. E., Ravina, B. M., Bankiewicz, K. S., Paul, S. M. & Sah, D. W. Y. Gene  
742 therapy for neurological disorders: Progress and prospects. *Nat. Rev. Drug Discov.* **17**,  
743 641–659 (2018).
- 744 22. Rose, J. A., Berns, K. I., Hoggan, M. D. & Koczot, F. J. Evidence for a single-stranded  
745 adenovirus-associated virus genome: formation of a DNA density hybrid on release of  
746 viral DNA. *Proc. Natl. Acad. Sci. U. S. A.* **64**, 863–869 (1969).
- 747 23. Samulski, R. J. & Muzyczka, N. AAV-mediated gene therapy for research and therapeutic  
748 purposes. *Annu. Rev. Virol.* **1**, 427–451 (2014).
- 749 24. Janik, J. E., Huston, M. M. & Rose, J. A. Adeno-associated virus proteins: origin of the  
750 capsid components. *J. Virol.* **52**, 591–597 (1984).
- 751 25. Mendelson, E., Trempe, J. P. & Carter, B. J. Identification of the trans-acting Rep proteins

- 752 of adeno-associated virus by antibodies to a synthetic oligopeptide. *J. Virol.* **60**, 823–832  
753 (1986).
- 754 26. Becerra, S. P., Koczot, F., Fabisch, P. & Rose, J. A. Synthesis of adeno-associated virus  
755 structural proteins requires both alternative mRNA splicing and alternative initiations  
756 from a single transcript. *J. Virol.* **62**, 2745–2754 (1988).
- 757 27. Trempe, J. P. & Carter, B. J. Alternate mRNA splicing is required for synthesis of adeno-  
758 associated virus VP1 capsid protein. *J. Virol.* **62**, 3356–3363 (1988).
- 759 28. Sonntag, F., Schmidt, K. & Kleinschmidt, J. A. A viral assembly factor promotes AAV2  
760 capsid formation in the nucleolus. *Proc. Natl. Acad. Sci. U. S. A.* **107**, 10220–10225  
761 (2010).
- 762 29. Johnson, F. B., Ozer, H. L. & Hoggan, M. D. Structural Proteins of Adenovirus-  
763 Associated Virus Type 3. *J. Virol.* **8**, 860–863 (1971).
- 764 30. Van Vliet, K. M., Blouin, V., Brument, N., Agbandje-McKenna, M. & Snyder, R. O. The  
765 role of the adeno-associated virus capsid in gene transfer. *Methods Mol. Biol.* **437**, 51–91  
766 (2008).
- 767 31. Daya, S. & Berns, K. I. Gene therapy using adeno-associated virus vectors. *Clin.*  
768 *Microbiol. Rev.* **21**, 583–593 (2008).
- 769 32. Xiao, X., Li, J. & Samulski, R. J. Efficient long-term gene transfer into muscle tissue of  
770 immunocompetent mice by adeno-associated virus vector. *J. Virol.* **70**, 8098–8108 (1996).
- 771 33. Naso, M. F., Tomkiewicz, B., Perry, W. L. & Strohl, W. R. Adeno-Associated Virus

- 772 (AAV) as a Vector for Gene Therapy. *BioDrugs* **31**, 317–334 (2017).
- 773 34. Lykken, E. A., Shyng, C., Edwards, R. J., Rozenberg, A. & Gray, S. J. Recent progress  
774 and considerations for AAV gene therapies targeting the central nervous system. *J.*  
775 *Neurodev. Disord.* **10**, 1–10 (2018).
- 776 35. Colella, P., Ronzitti, G. & Mingozzi, F. Emerging Issues in AAV-Mediated In Vivo Gene  
777 Therapy. *Mol. Ther. - Methods Clin. Dev.* **8**, 87–104 (2018).
- 778 36. Cearley, C. N. & Wolfe, J. H. Transduction characteristics of adeno-associated virus  
779 vectors expressing cap serotypes 7, 8, 9, and Rh10 in the mouse brain. *Mol. Ther.* **13**,  
780 528–537 (2006).
- 781 37. Foust, K. D. *et al.* Intravascular AAV9 preferentially targets neonatal neurons and adult  
782 astrocytes. *Nat. Biotechnol.* **27**, 59–65 (2009).
- 783 38. Gray, S. J., Nagabhushan Kalburgi, S., McCown, T. J. & Jude Samulski, R. Global CNS  
784 gene delivery and evasion of anti-AAV-neutralizing antibodies by intrathecal AAV  
785 administration in non-human primates. *Gene Ther.* **20**, 450–459 (2013).
- 786 39. Ojala, D. S. *et al.* In Vivo Selection of a Computationally Designed SCHEMA AAV  
787 Library Yields a Novel Variant for Infection of Adult Neural Stem Cells in the SVZ. *Mol.*  
788 *Ther.* **26**, 304–319 (2018).
- 789 40. Brown, N., Song, L., Kollu, N. R. & Hirsch, M. L. Adeno-Associated Virus Vectors and  
790 Stem Cells: Friends or Foes? *Hum. Gene Ther.* **28**, 450–463 (2017).
- 791 41. Kienle, E. *et al.* Engineering and evolution of synthetic adeno-associated virus (AAV)

- 792 gene therapy vectors via DNA family shuffling. *J. Vis. Exp.* 1–11 (2012)  
793 doi:10.3791/3819.
- 794 42. Srivastava, A. Adeno-Associated Virus: The Naturally Occurring Virus Versus the  
795 Recombinant Vector. *Hum. Gene Ther.* **27**, 1–6 (2016).
- 796 43. Körbelin, J. & Trepel, M. How to Successfully Screen Random Adeno-Associated Virus  
797 Display Peptide Libraries in Vivo. *Hum. Gene Ther. Methods* **28**, 109–123 (2017).
- 798 44. Büning, H. & Srivastava, A. Capsid Modifications for Targeting and Improving the  
799 Efficacy of AAV Vectors. *Mol. Ther. - Methods Clin. Dev.* **12**, 248–265 (2019).
- 800 45. Deverman, B. E. *et al.* Cre-dependent selection yields AAV variants for widespread gene  
801 transfer to the adult brain. *Nat. Biotechnol.* **34**, 204–209 (2016).
- 802 46. Herrmann, A. K. *et al.* A Robust and All-Inclusive Pipeline for Shuffling of Adeno-  
803 Associated Viruses. *ACS Synth. Biol.* **8**, (2019)
- 804 47. Grimm, D. & Zolotukhin, S. E Pluribus Unum: 50 Years of Research, Millions of Viruses,  
805 and One Goal-Tailored Acceleration of AAV Evolution. *Mol. Ther.* **23**, 1819–1831  
806 (2015).
- 807 48. Adachi, K., Enoki, T., Kawano, Y., Veraz, M. & Nakai, H. Drawing a high-resolution  
808 functional map of adeno-associated virus capsid by massively parallel sequencing. *Nat.*  
809 *Commun.* **5**, 1–14 (2014).
- 810 49. Marsic, D., Méndez-Gómez, H. R. & Zolotukhin, S. High-accuracy biodistribution  
811 analysis of adeno-associated virus variants by double barcode sequencing. *Mol. Ther. -*

- 812 *Methods Clin. Dev.* **2**, 15041 (2015).
- 813 50. Weinmann, J. *et al.* Identification of a myotropic AAV by massively parallel in vivo  
814 evaluation of barcoded capsid variants. *Nat. Commun.* **11**, 1–12 (2020).
- 815 51. Codega, P. *et al.* Prospective Identification and Purification of Quiescent Adult Neural  
816 Stem Cells from Their In Vivo Niche. *Neuron* **82**, 545–559 (2014).
- 817 52. Szczurkowska, J. *et al.* Targeted in vivo genetic manipulation of the mouse or rat brain by  
818 in utero electroporation with a triple-electrode probe. *Nat. Protoc.* **11**, 399–412 (2016).
- 819 53. Mirzadeh, Z., Merkle, F. T., Soriano-Navarro, M., Garcia-Verdugo, J. M. & Alvarez-  
820 Buylla, A. Neural Stem Cells Confer Unique Pinwheel Architecture to the Ventricular  
821 Surface in Neurogenic Regions of the Adult Brain. *Cell Stem Cell* **3**, 265–278 (2008).
- 822 54. Shah, P. T. *et al.* Single-Cell Transcriptomics and Fate Mapping of Ependymal Cells  
823 Reveals an Absence of Neural Stem Cell Function. *Cell* **173**, 1045-1057.e9 (2018).
- 824 55. Qiao, C. *et al.* Liver-specific microRNA-122 target sequences incorporated in AAV  
825 vectors efficiently inhibits transgene expression in the liver. *Gene Ther.* **18**, 403–410  
826 (2011).
- 827 56. Geisler, A. & Fechner, H. MicroRNA-regulated viral vectors for gene therapy. *World J.*  
828 *Exp. Med.* **6**, 37 (2016).
- 829 57. Baser, A. *et al.* Onset of differentiation is post-transcriptionally controlled in adult neural  
830 stem cells. *Nature* **566**, 100–104 (2019).
- 831 58. Niu, W., Zou, Y., Shen, C. & Zhang, C. L. Activation of postnatal neural stem cells

- 832 requires nuclear receptor TLX. *J. Neurosci.* **31**, 13816–13828 (2011).
- 833 59. Svensson, V. Droplet scRNA-seq is not zero-inflated. *Nature Biotechnology* vol. 38 147–  
834 150 (2020).
- 835 60. Liu, Y. *et al.* Promoter effects of adeno-associated viral vector for transgene expression in  
836 the cochlea in vivo. *Exp. Mol. Med.* **39**, 170–175 (2007).
- 837 61. Damdindorj, L. *et al.* A comparative analysis of constitutive promoters located in adeno-  
838 associated viral vectors. *PLoS One* **9**, 1–10 (2014).
- 839 62. Kotterman, M. A., Vazin, T. & Schaffer, D. V. Enhanced selective gene delivery to neural  
840 stem cells in vivo by an adeno-associated viral variant. *Dev.* **142**, 1885–1892 (2015).
- 841 63. Crowther, A. J. *et al.* An Adeno-Associated Virus-Based Toolkit for Preferential  
842 Targeting and Manipulating Quiescent Neural Stem Cells in the Adult Hippocampus. *Stem*  
843 *Cell Reports* **10**, 1146–1159 (2018).
- 844 64. Sallach, J. *et al.* Tropism-modified AAV vectors overcome barriers to successful  
845 cutaneous therapy. *Mol. Ther.* **22**, 929–939 (2014).
- 846 65. Hordeaux, J. *et al.* The GPI-Linked Protein LY6A Drives AAV-PHP.B Transport across  
847 the Blood-Brain Barrier. *Mol. Ther.* **27**, 912–921 (2019).
- 848 66. Matsuzaki, Y. *et al.* Neurotropic Properties of AAV-PHP.B Are Shared among Diverse  
849 Inbred Strains of Mice. *Mol. Ther.* **27**, 700–704 (2019).
- 850 67. Vandenberghe, L. H. AAV Engineering Identifies a Species Barrier That Highlights a  
851 Portal to the Brain. *Mol. Ther.* **27**, 901–903 (2019).



- 852 68. Pillay, S. *et al.* An essential receptor for adeno-associated virus infection. *Nature* **530**,  
853 108–112 (2016).
- 854 69. Zhong, L. *et al.* Next generation of adeno-associated virus 2 vectors: Point mutations in  
855 tyrosines lead to high-efficiency transduction at lower doses. *Proc. Natl. Acad. Sci. U. S.*  
856 *A.* **105**, 7827–7832 (2008).
- 857 70. Alemany, A., Florescu, M., Baron, C. S., Peterson-Maduro, J. & Van Oudenaarden, A.  
858 Whole-organism clone tracing using single-cell sequencing. *Nature* **556**, 108–112 (2018).
- 859 71. Raj, B. *et al.* Simultaneous single-cell profiling of lineages and cell types in the vertebrate  
860 brain. *Nat. Biotechnol.* **36**, 442–450 (2018).
- 861 72. Börner, K. *et al.* Robust RNAi enhancement via human Argonaute-2 overexpression from  
862 plasmids, viral vectors and cell lines. *Nucleic Acids Res.* **41**, 1–22 (2013).
- 863 73. Sarcar, S. *et al.* Next-generation muscle-directed gene therapy by in silico vector design.  
864 *Nat. Commun.* **10**, 1–16 (2019).
- 865 74. Börner, K. *et al.* Pre-arrayed Pan-AAV Peptide Display Libraries for Rapid Single-Round  
866 Screening. *Mol. Ther.* **28**, 1016–1032 (2020).
- 867 75. Senís, E. *et al.* AAVvector-mediated in vivo reprogramming into pluripotency. *Nat.*  
868 *Commun.* **9**, 2651 (2018).
- 869 76. Mirzadeh, Z., Doetsch, F., Sawamoto, K., Wichterle, H. & Alvarez-Buylla, A. The  
870 subventricular zone en-face: Wholemount staining and ependymal flow. *J. Vis. Exp.* **39**,  
871 (2010).

- 872 77. Walker, T. L. & Kempermann, G. One mouse, two cultures: Isolation and culture of adult  
873 neural stem cells from the two neurogenic zones of individual mice. *J. Vis. Exp.* **84**,  
874 (2014).
- 875 78. Bray, N. L., Pimentel, H., Melsted, P. & Pachter, L. Near-optimal probabilistic RNA-seq  
876 quantification. *Nat. Biotechnol.* **34**, 525–527 (2016).
- 877 79. Melsted, P., Ntranos, V. & Pachter, L. The barcode, UMI, set format and BUStools.  
878 *Bioinformatics* **35**, 4472–4473 (2019).
- 879 80. Wolf, F. A., Angerer, P. & Theis, F. J. SCANPY: Large-scale single-cell gene expression  
880 data analysis. *Genome Biol.* **19**, 15 (2018).
- 881 81. Tirosh, I. *et al.* Dissecting the multicellular ecosystem of metastatic melanoma by single-  
882 cell RNA-seq. *Science* **352**, 189–196 (2016).
- 883 82. Love, M. I., Huber, W. & Anders, S. Moderated estimation of fold change and dispersion  
884 for RNA-seq data with DESeq2. *Genome Biol.* **15**, 1–21 (2014).
- 885 83. Stuart, T. *et al.* Comprehensive Integration of Single-Cell Data. *Cell* **177**, 1888–1902.e21  
886 (2019).
- 887 84. Picelli, S. *et al.* Full-length RNA-seq from single cells using Smart-seq2. *Nat. Protoc.* **9**,  
888 171–181 (2014).
- 889
- 890

891 **Conflicts of Interest**

892 D.G. is a co-founder and shareholder of AaviGen GmbH. All other authors declare that the research  
893 was conducted in the absence of any commercial or financial relationships that could be construed  
894 as a potential conflict of interest.

895 **Author Contributions**

896 SD was involved in project and experimental design, performed experiments including *in vitro*  
897 and *in vivo* screens, *ex vivo* NSC transplantation, *in vitro* and *in vivo* validations. LPMK was  
898 responsible for the bioinformatics analysis of all *in vitro* and *in vivo* screens and sequencing  
899 experiments. SK and SC conducted the single cell RNA sequencing experiment. SC conducted the  
900 FACS quantification of cells transduced with lead-candidates. TS was responsible for the  
901 mathematical modeling of the *in vivo* data. JW provided the two AAV capsid libraries and  
902 contributed to experimental design. HA and AL helped in producing AAV vectors. AM-C  
903 contributed to the development of the mathematical model, interpretation of data, and revision of  
904 the manuscript. DG, SA, AM-C and AM-V supervised the project and wrote the manuscript. AM-  
905 V designed and coordinated the study. All authors have read and approved the final version of the  
906 manuscript.

907 **Funding**

908 This work was supported by the German Research Foundation (DFG; SFB873), the European  
909 Research Council (ERC; REBUILD\_CNS) and the DKFZ.

910 DG kindly acknowledges funding by the German Research Foundation (DFG, EXC81 [Cluster of  
911 Excellence CellNetworks]; SFB1129 [Collaborative Research Center 1129, TP2/16,

912 Projektnummer 240245660]; and TRR179 [Transregional Collaborative Research Center 179,  
913 TP18, Projektnummer 272983813]).

914

915 **Figure Legends:**

916 **Figure 1: *In vivo* screening to identify AAV capsids that specifically target the v-SVZ**

917 **a** Schematic illustration of the experimental outline to perform the *in vivo* screening. IHC of **b** the  
918 v-SVZ (scale bar 50  $\mu$ m) or **c** the OB (scale bar 200  $\mu$ m and 30  $\mu$ m) after injection of library #1  
919 into the lateral ventricle. **d** Mean barcode proportion over all FACS-sorted cell types for libraries  
920 #1 and #3. Only the 71 capsids shared between the two libraries are shown. **e** Barcode proportion  
921 in sample, adjusted for abundance in library (normalized barcode proportion) over all FACS-sorted  
922 cell types seven days after library #1 transduction; n=3 sets per cell type. **f,g** Normalized barcode  
923 read count seven days after library #1 transduction of **f** qNSCs or of **g** aNSCs; n=3 sets. **h**  
924 Normalized barcode read count over all FACS-sorted cell types seven days after library #3  
925 transduction; n=2 sets for TAPs and neuroblasts, for all other cell types n=3 sets per cell type. **i,j**  
926 Normalized barcode read count seven days after library #3 transduction of **i** qNSCs or of **j** aNSCs;  
927 n=3 sets. **k,l** Normalized barcode read count of AAV2\_wt, AAV9\_wt, AAV9\_A2 and AAV1\_P5  
928 after library #1 (**k**) and #3 (**l**) transduction of qNSCs, aNSCs, TAPs, neuroblasts, ependymal cells,  
929 astrocytes, and oligodendrocytes. All mice were eight weeks old at the time of AAV injection and  
930 all values are given as mean  $\pm$  SEM. ITR, inverted terminal repeat; BGH, bovine growth hormone  
931 polyA signal; eYFP, enhanced yellow fluorescent protein; ICV, Intracerebroventricular. A set  
932 always consists of 6 mice. Three independent experiments were performed resulting in n = 3 sets  
933 (3 x 6 mice = 18 mice in total) (See also Figure S1 and S2).

934

935 **Figure 2: Assessment of expression dynamics and v-SVZ targeting of the lead candidate AAV**  
936 **capsids**

937 **a** Experimental outline to assess expression dynamics of AAV1\_P5, AAV9\_A2 and two wt  
938 capsids *in vitro*. **b** Representative images of NSCs *in vitro* transduced with different AAV capsids  
939 7 days after injection; scale bar 20  $\mu$ m. **c** Dynamics of tdTomato expression at different time points  
940 in primary cultured NSCs. AAV9\_wt\_3dpt ( $11.9\% \pm 5.04$ ) vs. AAV9\_A2\_3dpt ( $58.8\% \pm 8.24$ )  
941 vs. AAV1\_3dpt ( $44.4\% \pm 6.94$ ) (Kruskal-Wallis test followed by Dunn's post-hoc test). **d**  
942 Dynamics of GFP expression at different time points in primary cultured NSCs. **c,d** Cultured NSCs  
943 were used up to passage 7, n=3 cell cultures from 3 different mice. **e** Schematic illustration of the  
944 experimental outline to *in vivo* validate different AAV capsids. **f,g** IHC of the v-SVZ with markers  
945 to discriminate the different cell types after **f** AAV9\_wt and **g** AAV1\_P5 transduction (scale bar  
946 100  $\mu$ m and 50 $\mu$ m, respectively). **h** Markers for IHC used to discriminate the different cell types  
947 (NSCs left, ependymal cells right; scale bar 30  $\mu$ m). **i** Proportion of tdTomato-labeled cells located  
948 in the v-SVZ among all tdTomato-positive cells in a 25  $\mu$ m thick coronal brain section. A high  
949 proportion indicates regional specificity for the v-SVZ. AAV2\_wt ( $31.5\% \pm 5.9$ ) vs. AAV9\_wt  
950 ( $3.84\% \pm 0.33$ ) vs. AAV9\_A2 ( $81.6\% \pm 10.1$ ) vs. AAV1\_P5 ( $98.9\% \pm 1.13$ ). **j** Dynamics of  
951 tdTomato expression at different time points in the full v-SVZ. Bars are partitioned by the mean  
952 proportion of cell types across mice. AAV2\_wt\_5dpi ( $0.06 \pm 0.06$ ) vs. AAV1\_P5\_5dpi ( $4.67 \pm$   
953  $1.96$ ) and AAV2\_wt\_7dpi ( $0.22 \pm 0.11$ ) vs. AAV9\_A2\_7dpi ( $6.02 \pm 0.71$ ) vs. AAV1\_P5\_7dpi  
954 ( $4.17 \pm 1.20$ ). (See also Figure S3)

955

956 **Figure 3: single cell RNA-seq reveals transduction of cells of the adult NSC lineage by**  
957 **AAV1\_P5**

958 **a** Experimental outline of labeling, isolation and single cell RNA sequencing (scRNA-seq) of the  
959 adult NSC lineage using the AAV1\_P5 capsid. Top panel: Untransduced cells from the TiCY  
960 mouse line express NeoR. Cre-mediated recombination induces the expression of eYFP and the  
961 loss of NeoR expression. AAV1\_P5 loaded with Cre was delivered to the lateral ventricle of P91  
962 TiCY mice. After 5 weeks, all labeled (eYFP<sup>+</sup>) cells from the v-SVZ and the rest of the brain  
963 (striatum, rostral migratory stream [RMS] and olfactory bulb [OB]), as well as further unlabeled  
964 NSC lineage cells (GLAST<sup>+</sup> from v-SVZ) were sorted and used for scRNA-seq. **b** 2D  
965 representation of the resulting 4,572 single-cell transcriptomes. Most cells form one continuous  
966 trajectory from qNSCs to early NBs (ENB; mostly from v-SVZ) and late NBs / immature neurons  
967 (LNB; mostly from rest of brain). Few off-target cells including ependymal cells (Ep) and others  
968 (gray) were captured. **c** Fraction of eYFP<sup>+</sup> and NeoR<sup>+</sup> single-cell transcriptomes by cell type (m:  
969 cells per group). **d** Total number of uniquely identified mRNA molecules (UMI count) per cell,  
970 separated by cell type. **e** Maximum likelihood estimate of the fraction of transduced cells, based  
971 on values in c and d. LNB and Ep were sorted by eYFP<sup>+</sup> only and act as a control with an expected  
972 transduction rate of 100%. **f** Expression of G2/M phase marker genes across samples and cell types  
973 (clusters from b), distinguishing between eYFP<sup>+</sup> and eYFP<sup>-</sup> cells. **g** Left: MA plot of gene  
974 expression differences between eYFP<sup>+</sup> and eYFP<sup>-</sup> cells. Right: log<sub>2</sub> fold change distribution for all  
975 genes (gray) and viral response genes (blue). Cre, Cre recombinase; ICV, intracerebroventricular;  
976 eYFP, enhanced yellow fluorescent protein; NeoR, neomycin resistance. (See also Figure S4)

977

978 **Figure 4: AAV1\_P5 targets qNSCs and the choice of promoter and viral load determines the**  
979 **number of generated OB neurons.**

980 **a** Schematic illustration of the experimental outline to test v-SVZ labeling with at different time  
981 points. **b** IHC of the v-SVZ (scale bar 50 $\mu$ m) and OB (scale bar 200 $\mu$ m and 50 $\mu$ m) in the high-  
982 labeled and low labeled group 35 days post AAV injection. **c** Time dynamics of labeled cells. Each  
983 mouse is identified by one symbol. Due to the heterogeneity among individual mice, each mouse  
984 was assigned to one of two groups. The color of the symbols indicates to which group the  
985 respective mouse belongs. **d,e** Comparison of model fit and data. **d** compares the fit to data from  
986 the high-labeled group 1 and **e** compares to data from low-labeled group 2. The model was fit to  
987 both groups simultaneously. Only the number of initially labeled NSCs and TAPs differs between  
988 the two groups. **f** Redistribution of labeled NSC between the active and the quiescent state. We  
989 compare two scenarios. In the first scenario (red lines) the virus targets only aNSC. In the second  
990 scenario (blue lines) the virus targets only qNSCs. After 4 days the number of labeled aNSC are  
991 identical for both scenarios (lower panel). The same applies to the number of labeled qNSCs (upper  
992 panel), since aNSC can become quiescent after division and qNSCs can become activated. Black  
993 dots indicate FACS quantifications of NSCs labeled by the AAV1\_P5\_YFP adenovirus (as shown  
994 in Fig S3c,d). Virus injection took place at time 0. **g** Experimental layout of FACS quantification  
995 of TiCY mice to analyze labeling efficiency of the v-SVZ and olfactory bulb using AAV1\_P5\_Cre.  
996 **h** Quantification of FACS events: Total NSC count in the v-SVZ; proportion of active to quiescent  
997 NSCs; proportion of eYFP<sup>+</sup> NSCs and TAPs; and proportion of eYFP<sup>+</sup> neuroblasts in the v-SVZ  
998 and olfactory bulb. Cre, Cre recombinase; SV40, Simian-Virus 40 polyA signal; ICV,  
999 intracerebroventricular. (See also Figure S4 and S5).

1000 **Figure 1**

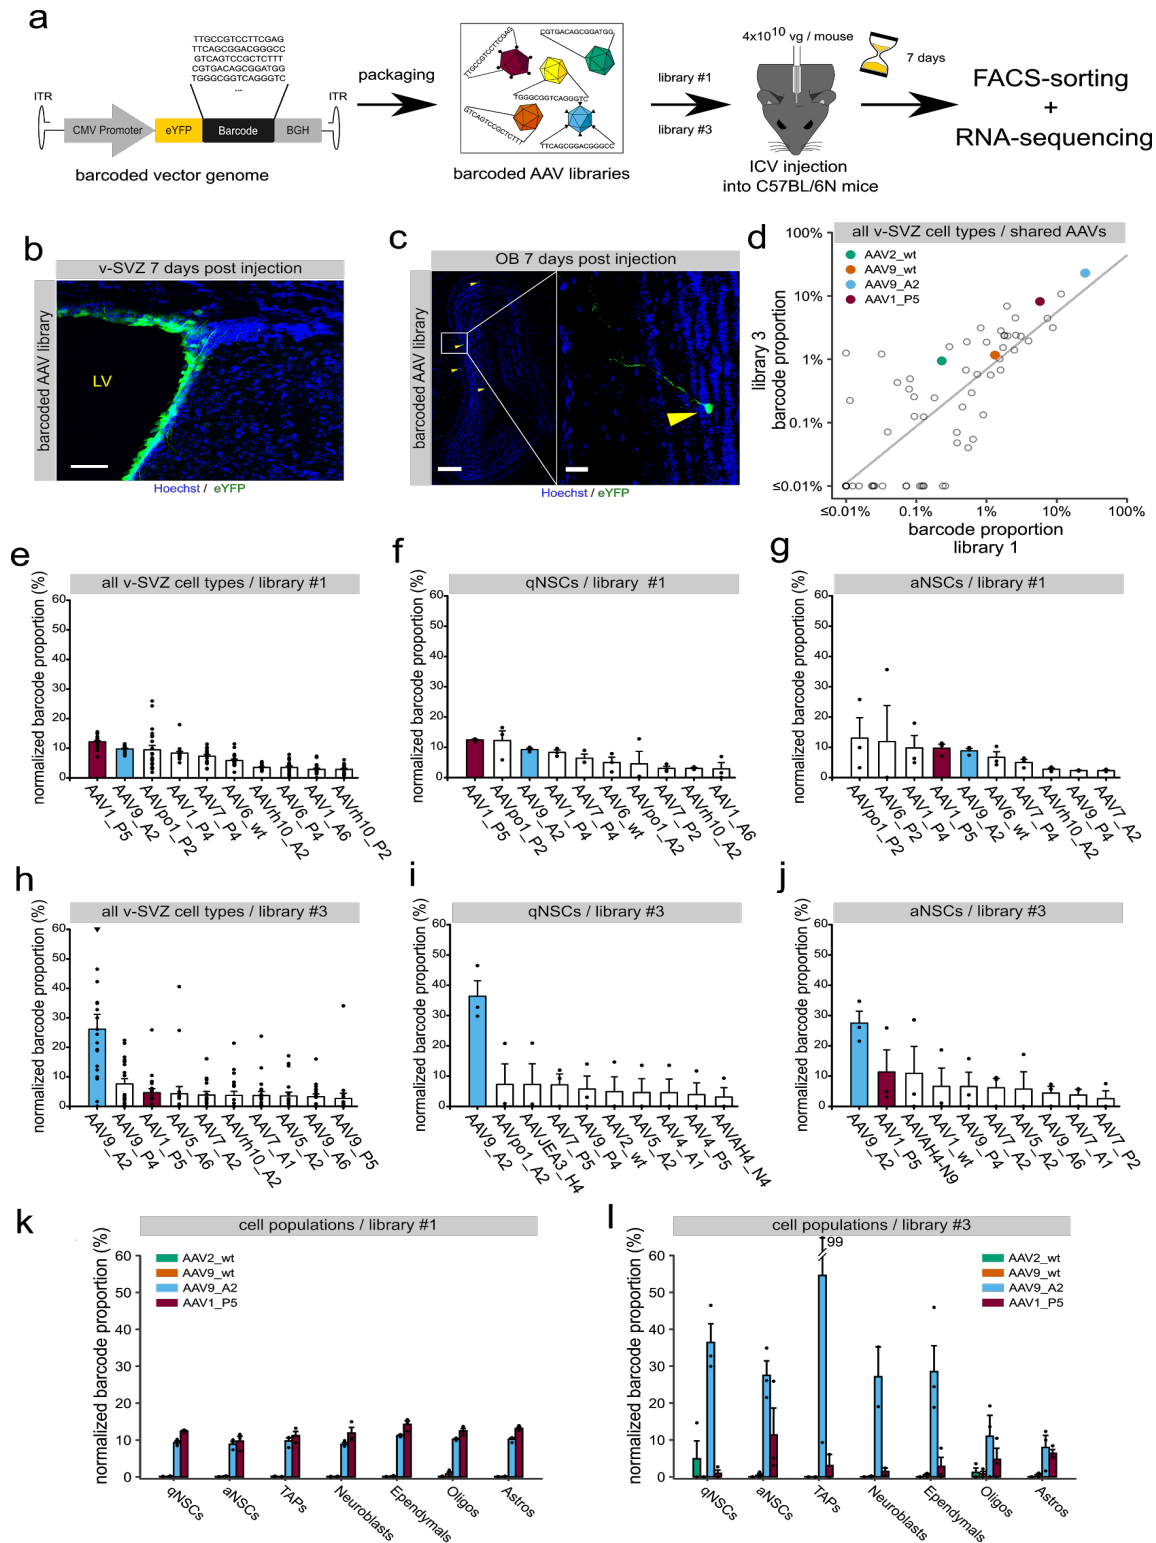

1001



1002 **Figure 2**

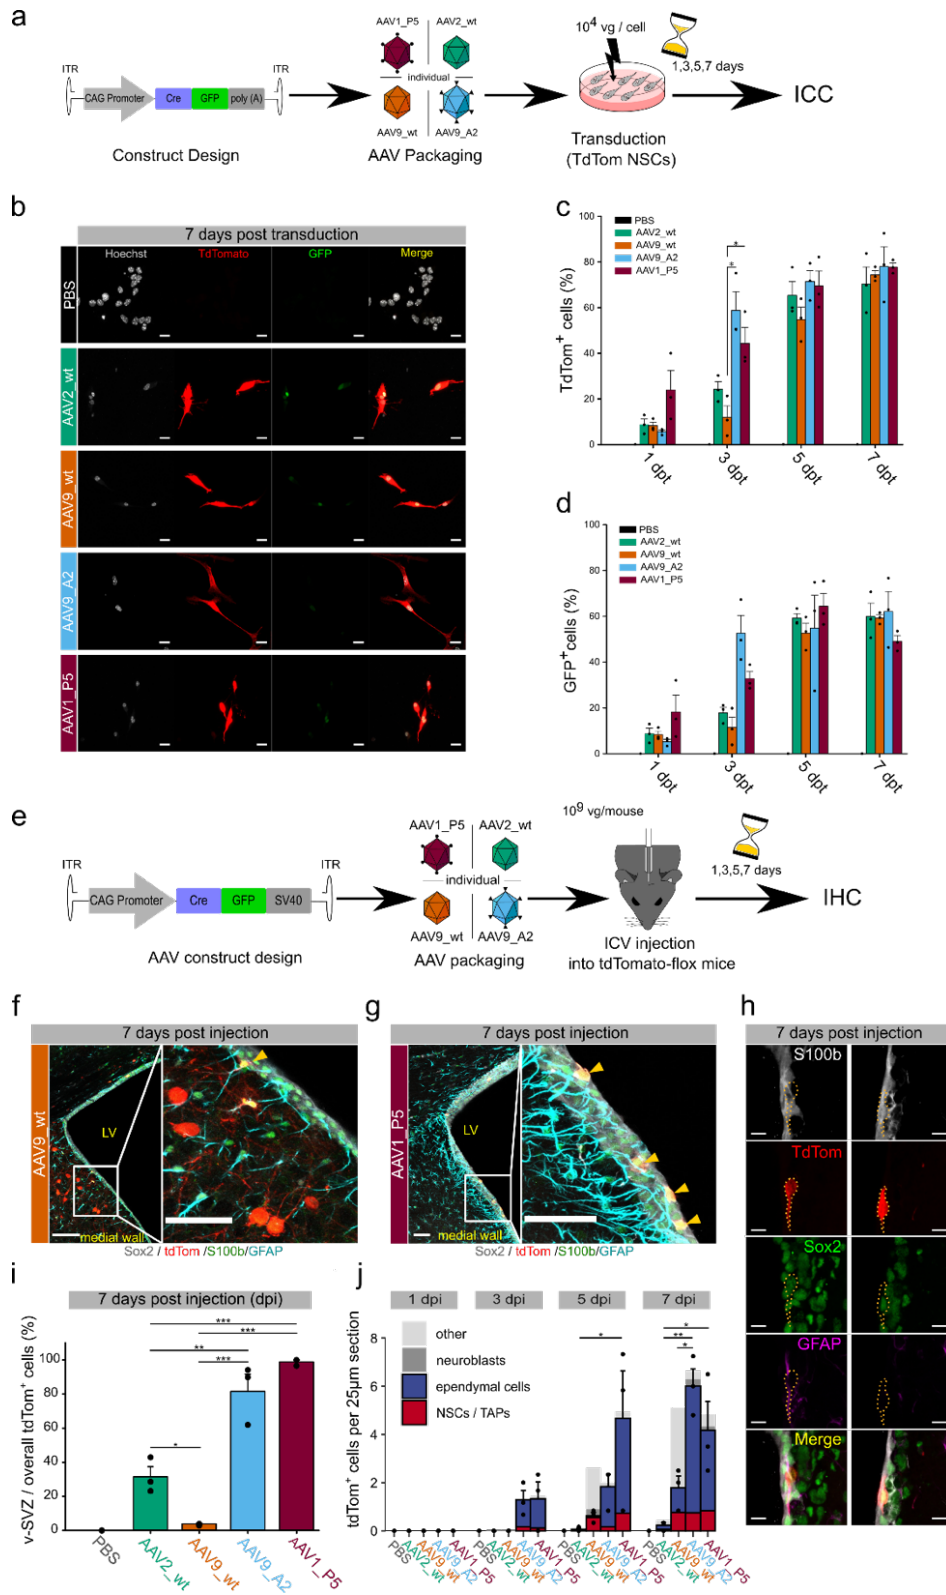

1003

1004 **Figure 3**

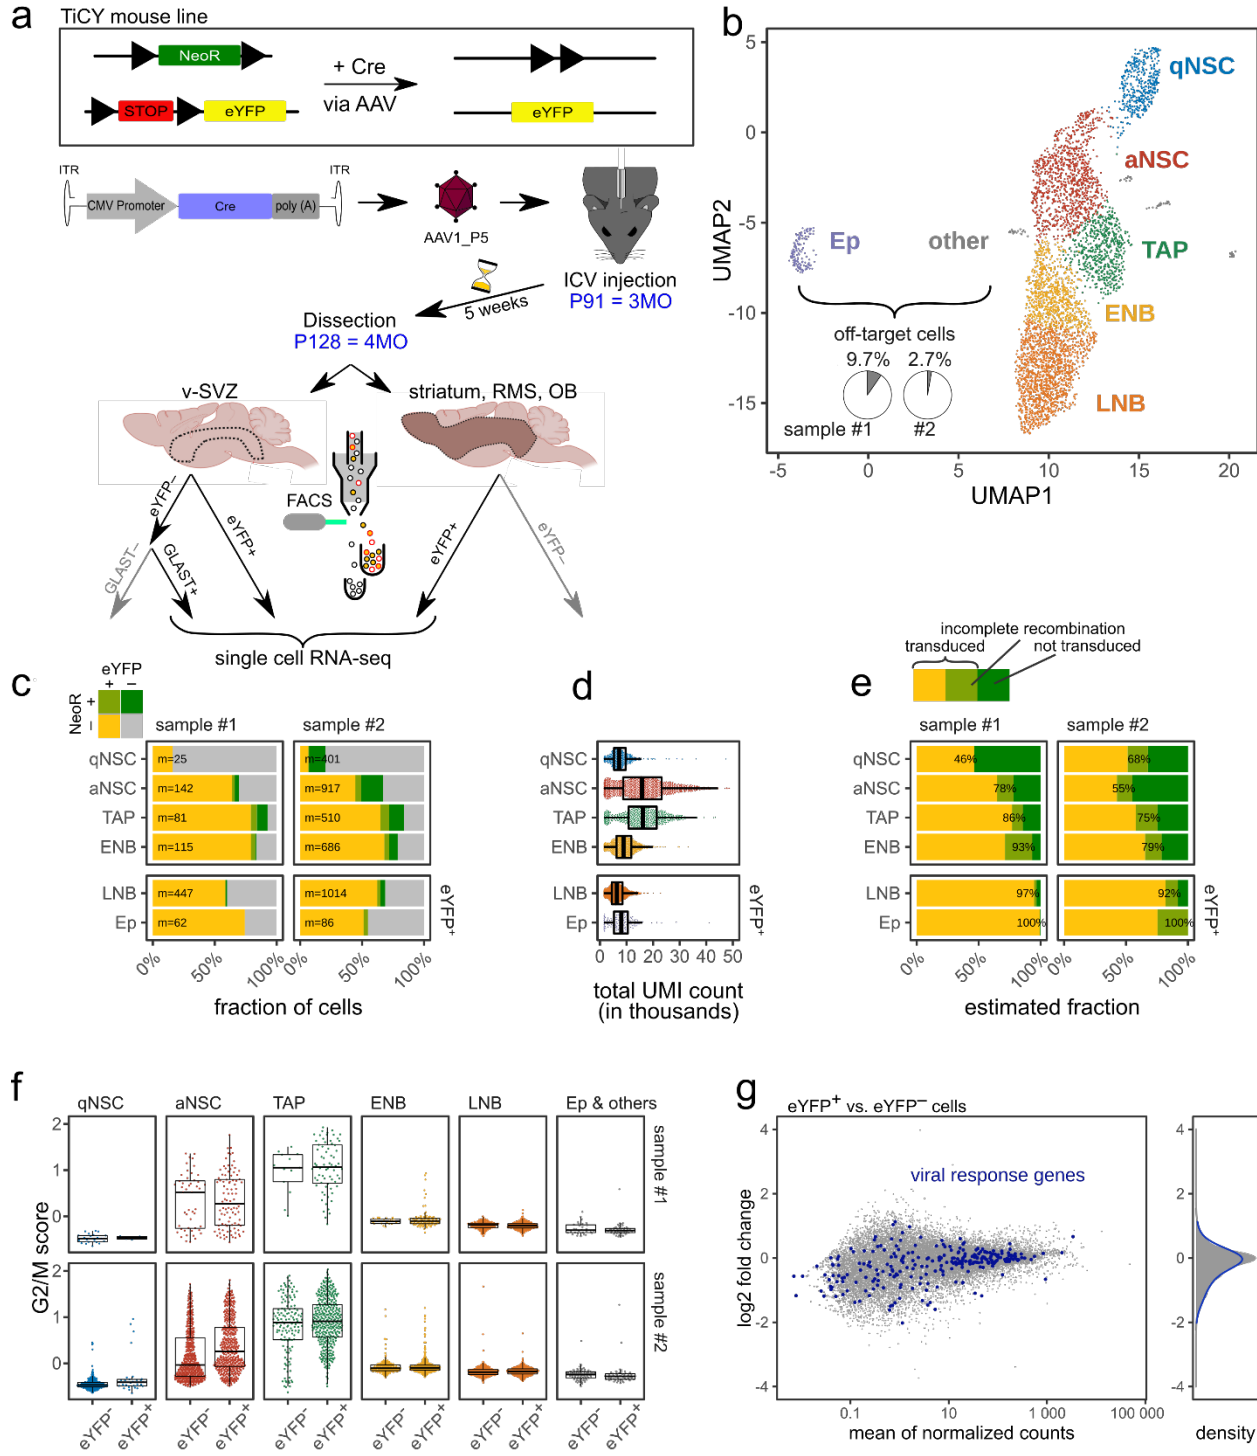

1005

1006 **Figure 4**

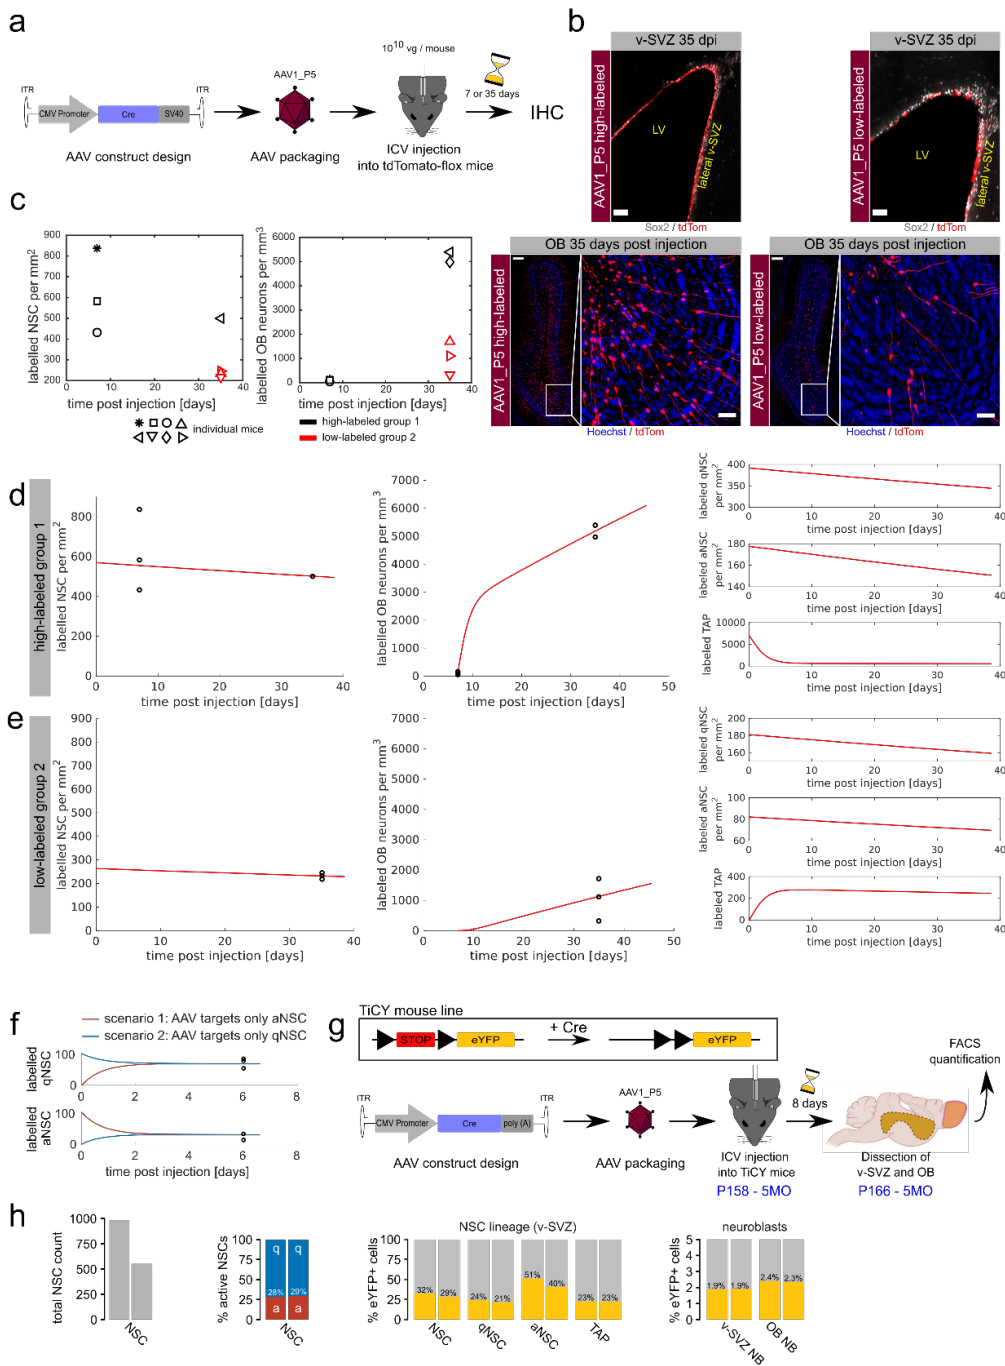

1007
